# Supplementary material for: Characterisation of the phytochemical and bioactivity profiles of raw tea, stale-aroma, and betelnut-aroma type of Liupao tea through GC/LC-MS-based metabolomics
Source: Royal Society of Chemistry journal article supplement (doi:10.1039/d4ay01672f), 2024-12-09
Supplement: d4ay01672f1.pdf [file d4ay01672f1.pdf]

## Supporting Information

### Characterisation of the phytochemical and bioactivity profiles of raw tea, stale-aroma, and betelnut-aroma type of Liupao tea through GC/LC-MS-based metabolomics

#### Table of contents

|                                                                                                                               |    |
|-------------------------------------------------------------------------------------------------------------------------------|----|
| <b>Text S1.</b> Specific experimental procedures of different assays for <i>in vitro</i> bioactivities evaluation of LPT..... | 1  |
| <b>Figure S1.</b> HPLC profiles of SF, SA, BA, and standards by the UV with detected wavelength at 278 nm.....                | 5  |
| <b>Figure S2.</b> Colour of tea leaves and infusions of SF, SA, and BA.....                                                   | 6  |
| <b>Figure S3.</b> Multivariate statistical analyses of SF, SA, and BA. ....                                                   | 7  |
| <b>Table S1.</b> The conditions for HPLC analyses of GA, catechins, and caffeine. ....                                        | 8  |
| <b>Table S2.</b> The conditions for GC-MS analysis.....                                                                       | 9  |
| <b>Table S3.</b> Chromatographic conditions for metabolomic analysis. ....                                                    | 10 |
| <b>Table S4.</b> Chromatographic conditions for lipidomic analysis.....                                                       | 11 |
| <b>Table S5.</b> Mass spectrometric conditions for lipidomic and metabolomic analyses. ....                                   | 12 |
| <b>Table S6.</b> PerMANOVA tests of SF, SA, and BA (permutation: 999). ....                                                   | 13 |
| <b>Table S7.</b> Identified VOCs among the three types of LPT by GC-MS analysis.....                                          | 14 |

**Text S1.** Specific experimental procedures of different assays for *in vitro* bioactivities evaluation of LPT.

## **Antioxidant activities**

OH- radical scavenging capacity, DPPH radical scavenging capacity, and ABTS radical scavenging capacity were carried out according to the method reported in our previous study <sup>1</sup>.

### **OH- radical scavenging capacity**

According to the manufacturer's protocols, OH- radical scavenging activity was assessed with a hydroxyl free radical assay kit (Nanjing Jiancheng Biotechnology Co., Ltd, Nanjing, China).

The amount of H<sub>2</sub>O<sub>2</sub> is proportional to the amount of OH- produced by the Fenton reaction. The OH- free radical scavenging rate was calculated using the following equation:

$$\text{OH- radical scavenging rate (\%)} = \left[ 1 - \frac{(A_1 - A_2)}{A_0} \right] \times 100 \quad (1)$$

A<sub>0</sub> and A<sub>1</sub> represent the absorbance of the OH- radical solution without samples and reagent II (blank) and with samples and reagent II, respectively, while A<sub>2</sub> represents the absorbance of the samples' solution with ethanol.

### **DPPH radical scavenging capacity**

100 μL of the LPT extract at various concentrations was mixed with 100 μL of ethanol DPPH solution (0.1 mM). The reaction began for 30 min in the dark at 25°C. The absorbance of solutions at 517 nm was measured. The DPPH radical scavenging rate was calculated using the following equation:

$$\text{DPPH radical scavenging rate (\%)} = \left[ 1 - \frac{(A_1 - A_2)}{A_0} \right] \times 100 \quad (2)$$

A<sub>0</sub> and A<sub>1</sub> represent the absorbance of the DPPH radical solution with ethanol (control sample) and with samples, respectively, while A<sub>2</sub> represents the absorbance of the sample solution without the DPPH radical solution.

### **ABTS radical scavenging capacity**

ABTS+ working solution was prepared by 12 h of reaction of ABTS (7 mmol) with potassium persulfate (140 mM) at room temperature in the dark. Furthermore, the solution was diluted with ethanol solution until the absorbance was  $0.700 \pm 0.005$  at 734 nm before use<sup>2</sup>. The depolarization assay started by mixing 200  $\mu$ L the diluted ABTS+ working solution with 40  $\mu$ L different concentrations of LPT extract. The ABTS radical scavenging rate was calculated using the following equation:

$$\text{ABTS radical scavenging rate (\%)} = \left[ 1 - \frac{(A_1 - A_2)}{A_0} \right] \times 100 \quad (3)$$

$A_0$  and  $A_1$  represent the absorbance of the ABTS+ working solution with ethanol (control sample) and with samples, respectively, while  $A_2$  represents the absorbance of the sample solution without the ABTS+ working solution.

### **Anti-inflammatory activity**

#### **Inhibition of bovine serum albumin (BSA) denaturation**

The anti-inflammatory activity of three types of LPT extract was evaluated by the inhibition of the albumin denaturation technique with minor modification<sup>3</sup>. To 0.5 mL of the LPT extract at various concentrations, 0.5 mL of BSA solution (0.2%) prepared in phosphate buffer saline (PBS, pH 6.8) was added. The mixture was reacted at 37°C for 15 min and then incubated at 70°C for 5 min. The turbidity at 660 nm was recorded. The percentage of inhibition of BSA denaturation was calculated using the formula given below:

$$\text{Inhibition rate of denaturation (\%)} = \left[ \frac{(A_0 - A_1)}{A_0} \right] \times 100 \quad (4)$$

$A_0$  and  $A_1$  are the absorbance of BSA with PBS and with the samples, respectively.

### **Hypoglycemic activities**

#### **Inhibition of $\alpha$ -amylase**

66  $\alpha$ -Amylase inhibitory activity was performed according to the reported method with minor  
 67 modifications <sup>4</sup>. Briefly, 50  $\mu$ L of  $\alpha$ -amylase solution (1 U/mL, in 0.1 M PBS) and 50  $\mu$ L of  
 68 sample solutions at different concentrations were mixed and preincubated at 37°C for 10 min.  
 69 100  $\mu$ L of 2% starch solution was then added. After 10 min, 200  $\mu$ L of DNS reagent was added.  
 70 The absorbance at 540 nm was determined after the mixture was reacted in a 100°C water bath  
 71 for 5 min. The inhibition rate of  $\alpha$ -amylase was calculated as follows:

$$72 \text{ Inhibition rate (\%)} = \left[ 1 - \frac{(A_2 - A_3)}{(A_0 - A_1)} \right] \times 100 \quad (5)$$

73  $A_0$  and  $A_1$  denote the absorbance values of the control and the control blank, respectively,  
 74 while  $A_2$  and  $A_3$  are the absorbance values of the sample and the sample blank, respectively.

#### 75 **Inhibition of $\alpha$ -glucosidase**

76 A total of 50  $\mu$ L of 50 mM phosphate buffer solution (PBS, pH 6.8), 20  $\mu$ L of  $\alpha$ -glucosidase  
 77 solution (1 U/mL), and 20  $\mu$ L of tea sample at varying concentrations were mixed and  
 78 preincubated at 37°C for 5 min. Then 20  $\mu$ L of 1 mM PNPG (in 0.1 M PBS) was added. After  
 79 the mixture was reacted for 30 min at 37°C, the reaction was stopped by adding 50  $\mu$ L of 0.2  
 80 M  $\text{Na}_2\text{CO}_3$ . The absorbance was measured at 405 nm <sup>5</sup>. The inhibition rate of  $\alpha$ -glucosidase  
 81 was calculated as follows:

$$82 \text{ Inhibition rate (\%)} = \left[ 1 - \frac{(A_2 - A_3)}{(A_0 - A_1)} \right] \times 100 \quad (6)$$

83  $A_0$  and  $A_1$  denote the absorbance values of the control and the control blank, respectively,  
 84 while  $A_2$  and  $A_3$  are the absorbance values of the sample and the sample blank, respectively.

#### 85 **Hypolipidemic activities**

##### 86 **Inhibition of pancreatic lipase**

87 The *in vitro* inhibition rate of pancreatic lipase of LPT extract was measured according to the  
 88 previously reported method with some modifications <sup>6</sup>. Briefly, a mixture comprised of 875  $\mu$ L

of Tris buffer (0.25 M, pH 7.4), 100  $\mu$ L of pancreatic lipase solution (10 mM), and 20  $\mu$ L of tea samples of various concentrations was preincubated for 5 min at 37 °C, followed by addition of 5  $\mu$ L of the pNPB (10 mM). Subsequently, the mixture was reacted at 37 °C for 2.5 min. The absorbance of the final mixture was measured at 405 nm. The inhibition activities of pancreatic lipase of LPT were calculated using the following formula:

$$\text{Inhibition rate (\%)} = \left[ 1 - \frac{(A_1 - A_2)}{A_0} \right] \times 100 \quad (7)$$

$A_0$  and  $A_1$  indicate the absorbance of the pancreatic lipase solution with tris buffer and with samples, respectively, while  $A_2$  represents the absorbance of the sample solution without the pancreatic lipase solution.

#### **Bile salt binding capacity**

The determination of bile salt binding capacity was performed according to a method with appropriate adjustments<sup>7,8</sup>. Briefly, the bile salts, including sodium taurocholate (STC, 0.5 mM) and sodium glycocholate (SGC, 0.5 mM) were dissolved in 0.1 M PBS (pH 6.8), respectively. Then, 0.4 mL of LPT extract was mixed with 0.8 mL of PBS solution and 0.8 mL of bile salt solution. The mixture was incubated at 37°C for 2 h and then centrifuged at 4000 rpm/min for 20 min. Next, 0.5 mL of the supernatant was added to 1.5 mL of 60% H<sub>2</sub>SO<sub>4</sub> to react for 20 min in a 70°C water bath. The absorbance values were measured at 387 nm after the mixture was placed in an ice bath for 5 min. The bile acid salt binding rate was calculated using the following formula:

$$\text{Bile salt binding rate (\%)} = \left[ 1 - \frac{(A_1 - A_2)}{A_0} \right] \times 100 \quad (8)$$

$A_0$  and  $A_1$  indicate the absorbance of the bile salt solution with PBS and with samples, respectively, while  $A_2$  represents the absorbance of the sample solution without the bile salt solution.

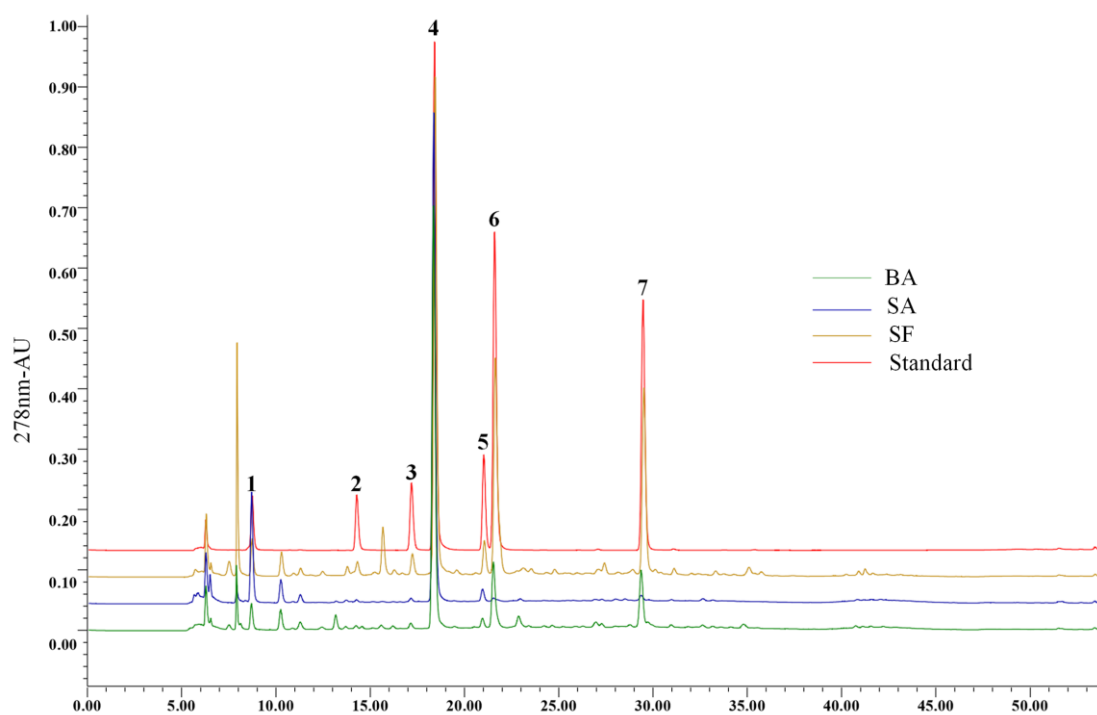

112

113 **Figure S1.** HPLC profiles of SF, SA, BA, and standards by the UV with detected wavelength  
 114 at 278 nm. Standards: peak 1, gallic acid; peak 2, (-)-epigallocatechin; peak 3, (+)-catechin;  
 115 peak 4, caffeine; peak 5, (-)-epicatechin; peak 6, (-)-epigallocatechin gallate; peak 7, (-)-  
 116 epicatechin gallate. Note: data for SA and standards were obtained from our previous work <sup>9</sup>.

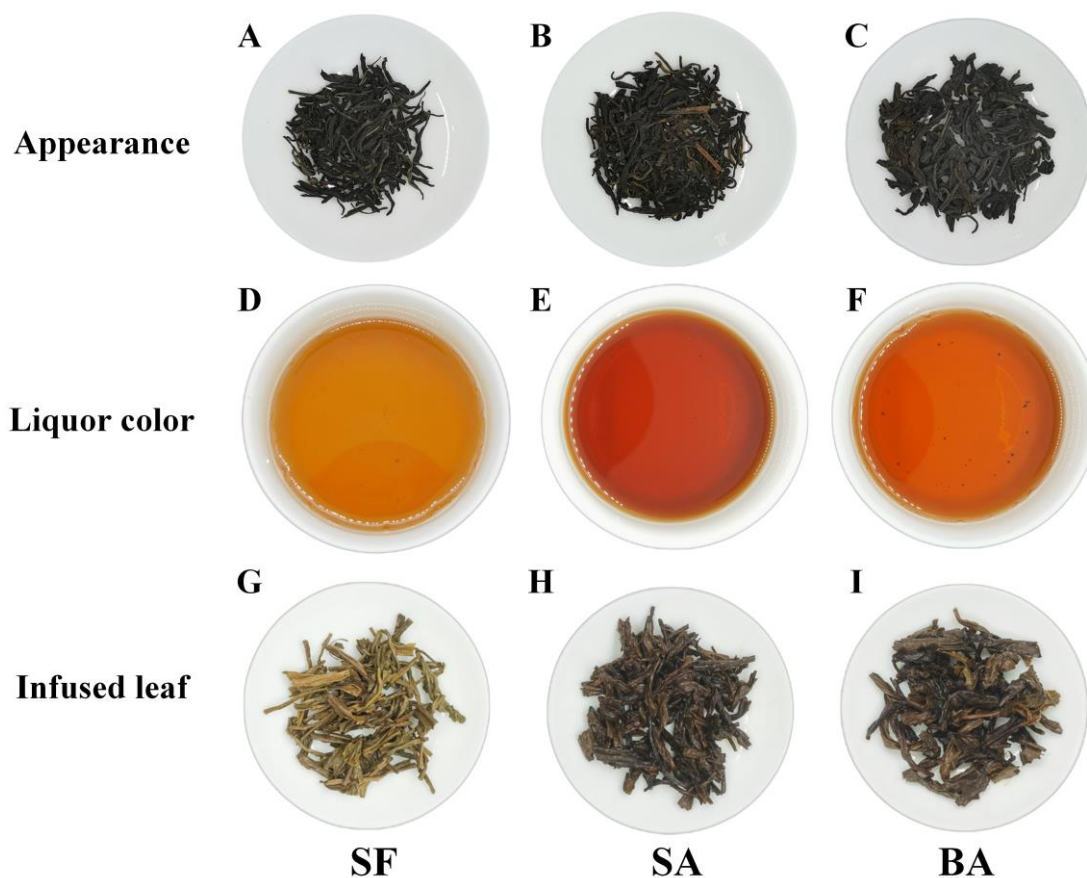

117  
 118 **Figure S2.** Colour of tea leaves and infusions of SF, SA, and BA. (A-C) Appearance of tea  
 119 leaves of SF, SA, and BA, respectively, (D-F) Tea infusions of SF, SA, and BA, respectively.  
 120 The tea infusions were prepared by the addition of 3 g tea leaves in 150 mL of boiling water,  
 121 which was then brewed for 2 min, (G-I) Infused leaves of SF, SA, and BA, respectively.

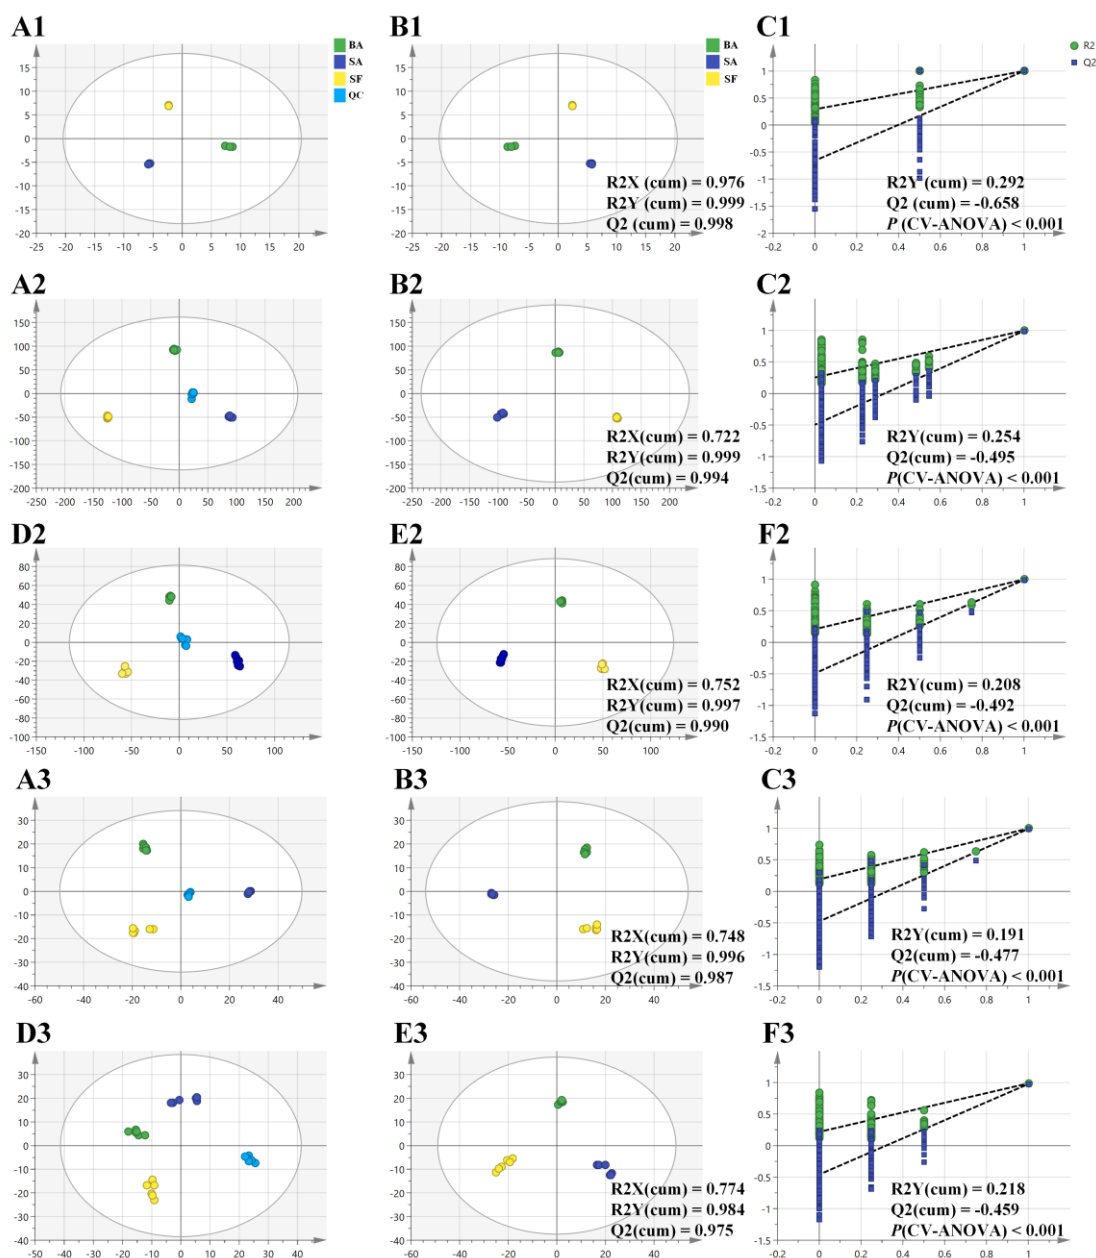

122  
 123 **Figure S3.** Multivariate statistical analyses of SF, SA, and BA. (A1-C1) PCA score plot, OPLS-  
 124 DA score plot, and overfitting test plot among three groups by GC-MS analysis, respectively,  
 125 (A2-F2) PCA score plot, OPLS-DA score plot, and overfitting test plot among three groups in  
 126 ESI+ and ESI- modes by LC-MS-based metabolomics, respectively, (A3-F3) PCA score plot,  
 127 OPLS-DA score plot, and overfitting test plot among three groups in ESI+ and ESI- modes by  
 128 LC-MS-based lipidomics, respectively.



129 **Table S1.** The conditions for HPLC analyses of GA, catechins, and caffeine.

| Time (min) | Flow rate (mL/min) | Mobile phase A (%) | Mobile phase B (%) |
|------------|--------------------|--------------------|--------------------|
| 0.00       | 0.4                | 10                 | 90                 |
| 25.00      | 0.4                | 25                 | 75                 |
| 30.00      | 0.4                | 25                 | 75                 |
| 40.00      | 0.4                | 50                 | 50                 |
| 42.00      | 0.4                | 100                | 0                  |
| 47.00      | 0.4                | 100                | 0                  |
| 47.01      | 0.4                | 10                 | 90                 |
| 54.00      | 0.4                | 10                 | 90                 |

130 Note: Analytical column: Agilent ZORBAX Eclipse Plus C18 column (250 mm × 4.6 mm, 5  
 131 μm) at 35°C temperature. The mobile phase A was CH<sub>3</sub>OH and mobile phase B was H<sub>2</sub>O, both  
 132 of which contained 0.1% formic acid. UV detection wavelength: 278 nm. Injection volume: 10  
 133 μL.

134 **Table S2.** The conditions for GC-MS analysis.

| <b>Gas chromatographic conditions</b> |                         |
|---------------------------------------|-------------------------|
| Carrier gas                           | Helium (purity>99.999%) |
| Inlet temperature                     | 250°C                   |
| Carrier gas flow rate                 | 1.0 mL/min              |
| Injection volume                      | 1 µL                    |
| <b>Temperature program</b>            |                         |
| Time (min)                            | Temperature (°C)        |
| 0.00                                  | 50                      |
| 2.00                                  | 50                      |
| 7.00                                  | 100                     |
| 32.00                                 | 300                     |
| 34.00                                 | 300                     |
| <b>Mass spectrometry conditions</b>   |                         |
| Ionization energy                     | 70 eV                   |
| Ion source temperature                | 230°C                   |
| Scan range                            | 40-600 <i>m/z</i>       |
| Solvent delay time                    | 3.0 min                 |

135

136 **Table S3.** Chromatographic conditions for metabolomic analysis.

| Time (min) | Flow rate (mL/min) | Mobile phase A (%) | Mobile phase B (%) |
|------------|--------------------|--------------------|--------------------|
| 0.00       | 0.4                | 95                 | 5                  |
| 2.00       | 0.4                | 95                 | 5                  |
| 6.00       | 0.4                | 70                 | 30                 |
| 20.00      | 0.4                | 0                  | 100                |
| 24.00      | 0.4                | 0                  | 100                |
| 25.00      | 0.4                | 95                 | 5                  |

137 Note: Analytical column: Waters Acquity UPLC BEH C18 (1.8  $\mu$ m, 2.1mm  $\times$  100 mm) with  
 138 45°C column temperature. The mobile phases: A was ultrapure water and B was acetonitrile,  
 139 both of which contained 0.1% formic acid. Injection volume: 5  $\mu$ L.

140 **Table S4.** Chromatographic conditions for lipidomic analysis.

| Time (min) | Flow rate (mL/min) | Mobile phase A (%) | Mobile phase B (%) |
|------------|--------------------|--------------------|--------------------|
| 0.00       | 0.3                | 70                 | 30                 |
| 6.00       | 0.3                | 40                 | 60                 |
| 13.00      | 0.3                | 0                  | 100                |
| 19.00      | 0.3                | 0                  | 100                |
| 22.00      | 0.3                | 70                 | 30                 |

141 Note: Analytical column: Waters Acquity UPLC HSS T3 (1.8  $\mu$ m, 2.1mm  $\times$  100 mm) at 45°C  
 142 column temperature. The mobile phase A was acetonitrile-water (60:40, v/v), and mobile phase  
 143 B was isopropanol-acetonitrile (90:10, v/v), both of which contained 0.1% formic acid and 10  
 144 mM ammonium formate. Injection volume: 5  $\mu$ L.

145 **Table S5.** Mass spectrometric conditions for lipidomic and metabolomic analyses.

| Main parameters                  | Values                                                                           |
|----------------------------------|----------------------------------------------------------------------------------|
| Capillary voltage                | 3500 V                                                                           |
| Sheath gas flow rate             | 50 psi                                                                           |
| Auxiliary gas flow rate          | 13 arb                                                                           |
| Capillary temperature            | 320°C                                                                            |
| Auxiliary gas heater temperature | 420°C                                                                            |
| Capillary temperature            | 320°C                                                                            |
| Scan range                       | 100-1200 <i>m/z</i>                                                              |
| Scan mode                        | Full scan (resolution of 70,000) and data-dependent MS/MS (resolution of 17,500) |

146

147 **Table S6.** PerMANOVA tests of SF, SA, and BA (permutation: 999).

| Analysis                 | ESI mode | <i>p</i> value |           |           |
|--------------------------|----------|----------------|-----------|-----------|
|                          |          | SA vs. SF      | BA vs. SF | BA vs. SA |
| GC-MS-based metabolomics | -        | 2.50E-02       | 2.30E-02  | 2.90E-02  |
| LC-MS-based metabolomics | ESI+     | 1.00E-03       | 6.00E-03  | 2.00E-03  |
|                          | ESI-     | 3.00E-03       | 1.00E-03  | 4.00E-03  |
| LC-MS-based lipidomics   | ESI+     | 6.00E-03       | 2.00E-03  | 3.00E-03  |
|                          | ESI-     | 4.00E-03       | 3.00E-03  | 3.00E-03  |

148

149 **Table S7.** Identified VOCs among the three types of LPT by GC-MS analysis.

| NO.              | Compounds                | Odor description                                                               | OT (mg/kg)           | RI<br>(Theoretical) | RI<br>(Calculated) | ID     | CAS        |
|------------------|--------------------------|--------------------------------------------------------------------------------|----------------------|---------------------|--------------------|--------|------------|
| <b>Alcohols</b>  |                          |                                                                                |                      |                     |                    |        |            |
| 1                | Phytol                   | floral, balsam, waxy <sup>a</sup>                                              | 0.64000 <sup>A</sup> | 2111                | 2114               | MS, RI | 150-86-7   |
| 2                | Geraniol                 | sweet-rose, waxy, citrus <sup>a</sup>                                          | 0.00110 <sup>A</sup> | 1252                | 1254               | MS, RI | 106-24-1   |
| 3                | Cis-Linalool Oxide       | earthy, floral, sweet, woody <sup>a</sup>                                      | 0.00600 <sup>B</sup> | 1077                | 1077               | MS, RI | 5989-33-3  |
| 4                | Cyclobutanol             | -                                                                              | 4.60000 <sup>A</sup> | -                   | -                  | MS     | 2919-23-5  |
| 5                | Linalool                 | citrus, orange, lemon, floral,<br>waxy <sup>a</sup>                            | 0.00022 <sup>A</sup> | 1102                | 1103               | MS, RI | 78-70-6    |
| 6                | Nerol                    | sweet natural neroli citrus<br>magnolia <sup>a</sup>                           | 0.68000 <sup>A</sup> | 1230                | 1230               | MS, RI | 106-25-2   |
| 7                | Cedrol                   | woody, floral, cedar, musk <sup>a</sup>                                        | 0.00050 <sup>C</sup> | 1611                | 1611               | MS, RI | 77-53-2    |
| 8                | $\alpha$ -Terpineol      | citrus, woody, lemon, lime <sup>a</sup>                                        | 0.35000 <sup>C</sup> | 1191                | 1194               | MS, RI | 98-55-5    |
| 9                | 2,6-Dimethylcyclohexanol | -                                                                              | -                    | 1114                | 1115               | MS, RI | 5337-72-4  |
| 10               | Epicedrol                | -                                                                              | -                    | 1607                | 1611               | MS, RI | 19903-73-2 |
| <b>Aldehydes</b> |                          |                                                                                |                      |                     |                    |        |            |
| 11               | Benzeneacetaldehyde      | floral-hyacinth <sup>a</sup>                                                   | 0.00400 <sup>D</sup> | 1042                | 1049               | MS, RI | 122-78-1   |
| 12               | Benzaldehyde             | fruity <sup>c</sup>                                                            | 0.30000 <sup>A</sup> | 968                 | 966                | MS, RI | 100-52-7   |
| 13               | $\beta$ -Homocyclocitral | -                                                                              | -                    | 1254                | 1265               | MS, RI | 472-66-2   |
| 14               | $\beta$ -Cyclocitral     | tropical saffron herbal, rose,<br>tobacco <sup>a</sup>                         | 0.00500 <sup>A</sup> | 1227                | 1226               | MS, RI | 432-25-7   |
| 15               | Safranal                 | fresh, herbal, phenolic,<br>metallic, rosemary, tobacco,<br>spicy <sup>a</sup> | -                    | 1201                | 1205               | MS, RI | 116-26-7   |

**Hydrocarbon**

|    |                            |                     |                      |      |      |        |           |
|----|----------------------------|---------------------|----------------------|------|------|--------|-----------|
| 16 | Neo-allo-ocimene           | -                   | -                    | 1838 | 1833 | MS, RI | 7216-56-0 |
| 17 | Limonene                   | citrus <sup>a</sup> | 0.03400 <sup>A</sup> | 1030 | 1032 | MS, RI | 5989-27-5 |
| 18 | 1,1-Diphenylpropane        | -                   | -                    | -    | 1608 | MS     | 1530-03-6 |
| 19 | Fluorene                   | -                   | -                    | 1584 | 1589 | MS, RI | 86-73-7   |
| 20 | 1,6,7-Trimethylnaphthalene | -                   | -                    | 1572 | 1568 | MS, RI | 2245-38-7 |

**Ketones**

|    |                           |                                                                               |                       |      |      |        |            |
|----|---------------------------|-------------------------------------------------------------------------------|-----------------------|------|------|--------|------------|
| 21 | Hexahydrofarnesyl acetone | oily, herbal, jasmin, celery,<br>woody <sup>a</sup>                           | -                     | 1837 | 1841 | MS, RI | 502-69-2   |
| 22 | Isophorone                | cooling, woody, sweet, green,<br>camphoraceous, fruity, musty<br><sup>a</sup> | 11.00000 <sup>A</sup> | 1127 | 1127 | MS, RI | 78-59-1    |
| 23 | Geranylacetone            | fresh green, fruity, waxy, rose,<br>woody <sup>a</sup>                        | 0.06000 <sup>A</sup>  | 1453 | 1454 | MS, RI | 3796-70-1  |
| 24 | Farnesyl acetone          | flower, ether <sup>b</sup>                                                    | -                     | 1927 | 1921 | MS, RI | 1117-52-8  |
| 25 | $\beta$ -Ionone           | woody, floral, berry <sup>a</sup>                                             | 0.00020 <sup>D</sup>  | 1491 | 1494 | MS, RI | 79-77-6    |
| 26 | $\alpha$ -Ionone          | woody, floral <sup>a</sup>                                                    | 0.00040 <sup>D</sup>  | 1429 | 1431 | MS, RI | 127-41-3   |
| 27 | Dihydro- $\beta$ -ionone  | woody, floral <sup>a</sup>                                                    | 0.03100 <sup>C</sup>  | 1444 | 1443 | MS, RI | 17283-81-7 |

**Methoxybenzenes**

|    |                                  |                                                           |                      |      |      |        |           |
|----|----------------------------------|-----------------------------------------------------------|----------------------|------|------|--------|-----------|
| 28 | Elemicin                         | spice, flower <sup>b</sup>                                | -                    | 1554 | 1555 | MS, RI | 487-11-6  |
| 29 | 2-Methoxy-4-vinylphenol          | spicy, powdery clove, woody,<br>smoky, amber <sup>a</sup> | 0.01202 <sup>A</sup> | 1319 | 1320 | MS, RI | 7786-61-0 |
| 30 | 3,5-Dimethoxytoluene             | -                                                         | -                    | 1274 | 1271 | MS, RI | 4179-19-5 |
| 31 | 3,4-Dimethoxytoluene             | -                                                         | -                    | 1246 | 1239 | MS, RI | 494-99-5  |
| 32 | 1,2,3-Trimethoxy-5-methylbenzene | musty, earthy <sup>a</sup>                                | 0.00445 <sup>G</sup> | 1407 | 1401 | MS, RI | 6443-69-2 |
| 33 | 1,2,3-Trimethoxybenzene          | stale, musty <sup>d</sup>                                 | 0.00075 <sup>C</sup> | 1315 | 1315 | MS, RI | 634-36-6  |



|                    |                      |                                                                  |                        |      |      |        |            |
|--------------------|----------------------|------------------------------------------------------------------|------------------------|------|------|--------|------------|
| 34                 | 1,2-Dimethoxybenzene | sweet, creamy, vanilla, musty <sup>a</sup>                       | 0.00317 <sup>G</sup>   | 1150 | 1147 | MS, RI | 91-16-7    |
| <b>Phenols</b>     |                      |                                                                  |                        |      |      |        |            |
| 35                 | 4-Propoxyphenol      | -                                                                | -                      | -    | 1569 | MS     | 18979-50-5 |
| <b>Ester</b>       |                      |                                                                  |                        |      |      |        |            |
| 36                 | Ethyl palmitate      | waxy, fruity, creamy, milky, balsamic, greasy, oily <sup>a</sup> | 2.00000 <sup>A</sup>   | 1984 | 1985 | MS, RI | 628-97-7   |
| 37                 | Methyl stearate      | -                                                                | -                      | 2125 | 2124 | MS, RI | 112-61-8   |
| 38                 | Ethyl linolenate     | -                                                                | -                      | 2169 | 2163 | MS, RI | 1191-41-9  |
| 39                 | Methyl linolenate    | -                                                                | -                      | 2100 | 2103 | MS, RI | 301-00-8   |
| <b>Furans</b>      |                      |                                                                  |                        |      |      |        |            |
| 40                 | 2,5-Diformylfuran    | -                                                                | 100.00000 <sup>E</sup> | 1084 | 1092 | MS, RI | 823-82-5   |
| 41                 | Dihydroactinidiolide | musk, coumarin <sup>d</sup>                                      | 0.00210 <sup>F</sup>   | 1539 | 1541 | MS, RI | 17092-92-1 |
| <b>Fatty acids</b> |                      |                                                                  |                        |      |      |        |            |
| 42                 | Palmitic acid        | waxy, creamy fatty <sup>a</sup>                                  | 1.00000 <sup>F</sup>   | 1958 | 1956 | MS, RI | 57-10-3    |
| <b>Purines</b>     |                      |                                                                  |                        |      |      |        |            |
| 43                 | Caffeine             | -                                                                | -                      | 1842 | 1852 | MS, RI | 58-08-2    |

150 Note: OT: odour thresholds in water, which were obtained from several reported literature: <sup>A</sup> reference<sup>10</sup>; <sup>B</sup> reference<sup>11</sup>; <sup>C</sup> reference<sup>12</sup>; <sup>D</sup> reference<sup>13</sup>; <sup>E</sup> reference<sup>14</sup>; <sup>F</sup> reference<sup>15</sup>; <sup>G</sup> reference<sup>16</sup>. Odour

151 description was obtained from <sup>a</sup> <http://www.thegoodscentscompany.com/>; <sup>b</sup> <http://www.flavornet.org/>; <sup>c</sup> reference<sup>13</sup>; <sup>d</sup> reference<sup>12</sup>. The data were presented as the mean ± standard deviation (SD)

152 (n = 3). Different letters in the same row indicate significant differences between the two groups ( $p < 0.05$ ). ND means the compounds were not detected.

## 153    **References**

- 154    1.     H. W. Chen, H. L. Zhou, Z. Y. She, H. H. Lu, M. S. Wen, X. C. Wang, Z. J. Wei, S. Y.  
155           Yang, X. Guan, Y. Tong, Q. X. Qin, P. C. Zhu, Y. Y. Nong and Q. S. Zhang, *Lwt-Food*  
156           *Sci Technol*, 2024, **192**, 115723.
- 157    2.     Z. G. Tai, L. Cai, L. Dai, L. H. Dong, M. F. Wang, Y. B. Yang, Q. E. Cao and Z. T. Ding,  
158           *Food Chem*, 2011, **126**, 1648-1654.
- 159    3.     P. Kola, K. Metowogo, S. N. Manjula, G. Katawa, H. Elkhenany, K. M. Mruthunjaya,  
160           K. Eklu-Gadegbeku and K. A. Aklikokou, *J Ethnopharmacol*, 2022, **283**, 114673.
- 161    4.     L. Wei, L. Huang, L. J. Du, Q. J. Sun, C. Chen, J. Tang, J. W. Teng and B. Y. Wei, *Foods*,  
162           2023, **12**, 2226.
- 163    5.     Z. H. Pan, D. S. Ning, Y. X. Fu, D. P. Li, Z. Q. Zou, Y. C. Xie, L. L. Yu and L. C. Li, *J*  
164           *Agric Food Chem*, 2020, **68**, 1555-1562.
- 165    6.     S. N. C. Sridhar, S. Palawat and A. T. Paul, *Bioorg Chem*, 2019, **85**, 373-381.
- 166    7.     C. Daou and H. Zhang, *J Food Sci Tech Mys*, 2014, **51**, 3878-3885.
- 167    8.     W. J. Ma, Y. L. Shi, G. Z. Yang, J. Shi, J. P. Ji, Y. Zhang, J. T. Wang, Q. H. Peng, Z. Lin  
168           and H. P. Lv, *Food Chem*, 2022, **375**, 131877.
- 169    9.     H. J. Wei, H. L. Zhou, L. Huang, Q. S. Zhang, J. W. Teng, B. Y. Wei, N. Xia, R. Z. Qin  
170           and P. C. Zhu, *Int J Food Sci Tech*, 2023, **58**, 5154-5167.
- 171    10.    L. J. Van Gemert, *Odour thresholds. compilations of odour threshold values in air, water*  
172           *and other media.*, Oliemans Punter & Partners BV, The Netherlands, 2011.
- 173    11.    R. Joshi and A. Gulati, *Food Chem*, 2015, **167**, 290-298.
- 174    12.    X. J. Deng, G. H. Huang, Q. Tu, H. J. Zhou, Y. L. Li, H. Y. Shi, X. X. Wu, H. T. Ren, K.  
175           L. Huang, X. Y. He and W. T. Xu, *Food Chem*, 2021, **357**, 129783.

- 176 13. Q. Li, X. Hong, X. Zheng, Y. Xu, X. Lai, C. Teng, W. Wu, J. Huang and Z. Liu, *Food*  
177 *Res Int*, 2022, **152**, 110925.
- 178 14. L. J. Van Gemert, *Compilations of odour threshold values in water and other media.*,  
179 Oliemans Punter & Partners BV, The Netherlands, 2015.
- 180 15. X. X. Zheng, X. Hong, Y. L. Jin, C. Wang, Z. H. Liu, J. A. Huang and Q. Li, *Food Chem*  
181 *X*, 2022, **13**, 100248.
- 182 16. X. L. Pang, W. S. Yu, C. D. Cao, X. X. Yuan, J. Qiu, F. Y. Kong and J. H. Wu, *J Agric*  
183 *Food Chem*, 2019, **67**, 13139-13149.
- 184
