# Supplementary material for: Characterisation of the phytochemical and bioactivity profiles of raw tea, stale-aroma, and betelnut-aroma type of Liupao tea through GC/LC-MS-based metabolomics
Source: Royal Society of Chemistry journal article supplement (doi:10.1039/d4ay01672f), 2024-12-09
Supplement: d4ay01672f2.xlsx [file d4ay01672f2.xlsx]

## Sheet: Sheet1
Metabolites identification for LC-MS-based metabolomics
No.	Compounds	mzCloud Score	mzVault Score	Formula	ESI	RT (min)	m/z	Adduct	Classification	Area: BA-1.raw	Area: BA-2.raw	Area: BA-3.raw	Area: BA-4.raw	Area: BA-5.raw	Area: BA-6.raw	Area: SA-1.raw	Area: SA-2.raw	Area: SA-3.raw	Area: SA-4.raw	Area: SA-5.raw	Area: SA-6.raw	Area: SF-1.raw	Area: SF-2.raw	Area: SF-3.raw	Area: SF-4.raw	Area: SF-5.raw	Area: SF-6.raw
1	DGTS 34:3		65.7	C44 H79 N O7	pos	21.283	734.594	M+H	DGTS	1.39137e+07	1.44882e+07	1.50366e+07	1.72917e+07	1.3972e+07	1.3544e+07	6.60653e+06	7.78226e+06	7.78461e+06	7.06067e+06	7.28359e+06	7.85709e+06	2.18654e+07	2.03603e+07	2.16926e+07	2.00337e+07	2.30524e+07	2.3826e+07
2	DGTS 34:2		68.4	C44 H81 N O7	pos	21.799	736.61	M+H	DGTS	155088	113509	117727	138464	121529	118097	94574.1	142395	143404	118526	42317.6	158285	2.39616e+07	2.5527e+07	2.40293e+07	1.50508e+07	1.95701e+07	69324.2
3	LDGTS 18:3		66.8	C28 H49 N O6	pos	13.659	496.365	M+H	LDGTS	5.28045e+07	5.21349e+07	5.2701e+07	4.98568e+07	5.70893e+07	5.10221e+07	4.55997e+07	4.43559e+07	4.85766e+07	4.56416e+07	4.37938e+07	4.50345e+07	8.99004e+07	9.16109e+07	8.92698e+07	8.74603e+07	9.04653e+07	9.15526e+07
4	LDGTS 18:2		64.4	C28 H51 N O6	pos	14.559	498.38	M+H	LDGTS	2.04255e+08	1.9129e+08	1.96252e+08	1.91314e+08	1.97594e+08	1.98653e+08	1.6252e+08	1.7821e+08	1.71163e+08	1.70604e+08	1.73673e+08	1.65146e+08	2.19463e+08	2.30659e+08	2.26159e+08	2.16791e+08	2.43076e+08	2.15405e+08
5	LDGTS 18:1		75.3	C28 H53 N O6	pos	15.63	500.395	M+H	LDGTS	3.89272e+07	4.09859e+07	4.23128e+07	3.94045e+07	3.56432e+07	4.0531e+07	5.46396e+07	4.96898e+07	5.13482e+07	6.16141e+07	4.87292e+07	5.24394e+07	6.35483e+07	5.97061e+07	6.29956e+07	5.92737e+07	5.93674e+07	5.72849e+07
6	LDGTS 18:0		77.3	C28 H55 N O6	pos	16.874	502.411	M+H	LDGTS	5.63457e+06	5.8699e+06	5.46896e+06	6.27202e+06	5.67966e+06	5.02892e+06	2.81883e+06	3.136e+06	2.91863e+06	2.92621e+06	2.98439e+06	2.81232e+06	8.86875e+06	8.90954e+06	8.69924e+06	9.31724e+06	8.23564e+06	9.01735e+06
7	LDGTS 16:0		66.5	C26 H51 N O6	pos	14.8	474.38	M+H	LDGTS	1.06409e+07	9.63478e+06	9.80749e+06	9.52059e+06	9.60162e+06	9.44175e+06	8.76088e+06	8.64102e+06	8.73708e+06	8.53083e+06	9.76459e+06	8.6302e+06	1.40576e+07	1.33796e+07	1.31793e+07	1.41021e+07	1.29029e+07	1.337e+07
8	PC 36:6		73.6	C44 H76 N O8 P	pos	20.235	778.538	M+H	PC	5.08979e+08	5.53751e+08	6.49041e+08	4.25597e+08	4.91385e+08	4.94231e+08	2.09832e+08	2.0349e+08	1.79695e+08	2.38854e+08	1.87457e+08	1.57693e+08	9.20514e+08	1.07149e+09	1.26039e+09	1.01867e+09	1.00879e+09	9.56955e+08
9	PC 36:5		60.8	C44 H78 N O8 P	pos	20.896	780.553	M+H	PC	9.25468e+08	1.23505e+09	1.03768e+09	8.95812e+08	9.3594e+08	4.5752e+08	4.52525e+08	4.57418e+08	4.35037e+08	4.15012e+08	2.60139e+08	5.07253e+08	2.2271e+09	1.55812e+09	2.00543e+09	1.66152e+09	1.4393e+09	1.6687e+09
10	PC 36:4		75.6	C44 H80 N O8 P	pos	21.647	782.57	M+H	PC	7.63119e+08	4.65483e+08	5.34137e+08	9.2593e+08	4.7335e+08	6.59301e+08	2.49469e+08	2.87529e+08	2.73895e+08	2.78947e+08	2.35936e+08	2.66024e+08	5.95024e+08	7.24472e+08	5.81024e+08	3.79817e+08	4.90368e+08	9.00046e+08
11	PC 36:3		61.3	C44 H82 N O8 P	pos	22.6	784.585	M+H	PC	1.16009e+08	1.23778e+08	1.1652e+08	1.39927e+08	2.44969e+08	1.29871e+08	1.63026e+07	1.18804e+07	1.40479e+07	1.24507e+07	1.15541e+07	1.3855e+07	2.23618e+07	5.92985e+07	2.28931e+07	2.3744e+07	3.04204e+07	1.17828e+08
12	PC 35:5		60.5	C43 H76 N O8 P	pos	20.461	766.538	M+H	PC	2.27415e+06	3.59022e+06	2.32975e+06	2.84968e+06	3.71925e+06	3.53257e+06	585499	553702	554889	567986	510772	643101	7.92394e+06	9.45784e+06	1.12478e+07	9.27368e+06	9.08995e+06	8.52058e+06
13	PC 34:4		74.3	C42 H76 N O8 P	pos	19.407	754.539	M+H	PC	4.5754e+07	4.02533e+07	3.59454e+07	3.61017e+07	3.51874e+07	4.50229e+07	9.49545e+06	8.09006e+06	8.34124e+06	9.16063e+06	1.00262e+07	8.40653e+06	1.1302e+08	1.31465e+08	9.42463e+07	9.99238e+07	1.21769e+08	3.37598e+07
14	PC 34:3		61.4	C42 H78 N O8 P	pos	21.703	756.554	M+H	PC	6.88043e+08	4.72857e+08	6.22762e+08	6.84086e+08	6.20239e+08	4.21152e+08	1.40854e+08	1.65519e+08	1.30321e+08	2.00067e+08	1.90369e+08	1.89514e+08	1.16361e+09	8.97181e+08	4.52058e+08	5.5992e+08	7.65987e+08	9.81946e+08
15	PC 34:2		75.7	C42 H80 N O8 P	pos	22.585	758.57	M+H	PC	3.98338e+08	5.3499e+08	1.75427e+08	5.08362e+08	5.32779e+08	2.72518e+08	3.72682e+07	7.23843e+07	3.70809e+07	3.03968e+07	5.66553e+07	4.25416e+07	2.09822e+08	5.73894e+06	1.64966e+08	1.28346e+08	2.0451e+08	6.06129e+08
16	PC 34:1		60.6	C42 H82 N O8 P	pos	19.686	760.583	M+H	PC	111016	871541	768182	1.77313e+06	1.54383e+06	204242	208676	477745	142198	642830	725863	246329	225196	3.48133e+06	932096	1.73583e+06	1.08188e+06	1.34943e+06
17	PC 33:3		61.6	C41 H76 N O8 P	pos	21.229	742.539	M+H	PC	4.10581e+06	5.0206e+06	4.75328e+06	6.33249e+06	6.7112e+06	5.04327e+06	2.04811e+06	2.79534e+06	2.74344e+06	2.48748e+06	2.128e+06	2.55299e+06	4.48362e+06	1.99045e+07	1.89781e+07	1.89987e+07	2.01932e+07	1.81154e+07
18	PC 32:3		61.8	C40 H74 N O8 P	pos	20.672	728.523	M+H	PC	6.36055e+06	1.16946e+07	7.31842e+06	8.75718e+06	6.12451e+06	8.07002e+06	2.66641e+06	1.51139e+06	2.42683e+06	2.64728e+06	2.89268e+06	3.11388e+06	2.51553e+07	2.06785e+07	2.91005e+07	2.12316e+07	1.82299e+07	2.11875e+07
19	PC 32:2		75.3	C40 H76 N O8 P	pos	21.522	730.539	M+H	PC	3.2873e+06	3.64738e+06	3.71329e+06	6.40087e+06	4.65697e+06	4.32789e+06	1.83937e+06	2.12621e+06	1.80105e+06	1.69583e+06	2.1682e+06	2.00122e+06	7.00464e+06	8.91901e+06	8.66189e+06	6.85434e+06	8.4045e+06	8.7943e+06
20	PC 24:0		70.5	C32 H64 N O8 P	pos	18.88	622.445	M+H	PC	3.6061e+06	3.19934e+06	2.79878e+06	3.01426e+06	4.35898e+06	3.25806e+06	609665	213008	520570	276153	422259	376565	3.48516e+06	3.86991e+06	3.21676e+06	2.62618e+06	3.45787e+06	3.10731e+06
21	PC 20:2e		87	C28 H54 N O7 P	pos	14.931	548.372	M+H	PC	1.27332e+07	1.16733e+07	1.23699e+07	1.00707e+07	1.18029e+07	1.26824e+07	5.50636e+06	5.4346e+06	6.26867e+06	6.57215e+06	6.83573e+06	5.63068e+06	2.24439e+07	1.4582e+07	2.06675e+07	2.10177e+07	2.05116e+07	2.14572e+07
22	PC 20:2		62.8	C28 H52 N O8 P	pos	14.639	562.351	M+H	PC	1.24725e+07	1.07092e+07	1.16793e+07	1.20111e+07	1.13338e+07	1.1452e+07	3.10452e+06	3.31771e+06	3.2813e+06	3.08507e+06	4.09673e+06	3.6867e+06	1.35955e+07	1.25281e+07	1.31888e+07	1.33023e+07	1.297e+07	1.23498e+07
23	PC 20:1e		83.3	C28 H56 N O7 P	pos	11.992	550.387	M+H	PC	289445	207000	290414	1.10295e+06	304298	321314	729732	775496	125967	777833	378548	162458	485159	584257	699816	316166	455115	779565
24	PC 20:0e		75.7	C28 H58 N O7 P	pos	17.408	552.403	M+H	PC	2.28769e+06	2.10667e+06	2.19657e+06	2.28156e+06	2.18524e+06	1.94706e+06	1.666e+06	2.00292e+06	1.60948e+06	1.878e+06	1.46812e+06	1.59798e+06	5.69036e+06	5.3672e+06	5.44983e+06	5.33355e+06	5.69259e+06	5.41787e+06
25	PC 18:2e		84.7	C26 H50 N O7 P	pos	13.466	520.34	M+H	PC	3.17325e+09	3.42888e+09	3.32492e+09	3.24277e+09	3.30241e+09	3.29882e+09	1.67165e+09	1.70423e+09	1.6954e+09	1.64381e+09	1.64406e+09	1.72629e+09	5.68716e+09	6.50426e+09	6.37955e+09	5.72823e+09	5.86139e+09	6.04032e+09
26	PC 18:1e		86.1	C26 H52 N O7 P	pos	14.506	522.356	M+H	PC	1.27366e+09	1.16591e+09	1.1243e+09	1.10186e+09	1.20317e+09	1.16222e+09	5.64826e+08	5.35573e+08	5.24158e+08	5.56108e+08	5.74648e+08	4.12568e+08	1.64362e+09	1.64249e+09	1.59376e+09	1.57929e+09	1.61245e+09	1.56673e+09
27	PC 18:0e		68.7	C26 H54 N O7 P	pos	16.098	524.372	M+H	PC	1.76508e+09	1.96796e+09	1.81227e+09	1.78613e+09	1.85622e+09	1.68509e+09	1.45216e+09	1.30961e+09	1.37929e+09	1.45724e+09	1.2968e+09	1.30959e+09	4.44344e+09	4.55486e+09	4.50683e+09	4.38072e+09	4.18995e+09	4.26672e+09
28	PC 16:1e		80.4	C24 H48 N O7 P	pos	12.903	494.325	M+H	PC	1.7729e+07	1.66994e+07	1.86679e+07	1.51764e+07	1.68978e+07	1.8561e+07	1.1478e+07	1.2384e+07	1.2635e+07	1.22856e+07	1.31414e+07	1.23927e+07	2.86007e+07	2.36191e+07	2.90741e+07	2.98977e+07	2.3729e+07	2.3216e+07
29	PC 16:0e		64.8	C24 H50 N O7 P	pos	14.417	496.34	M+H	PC	1.64069e+10	1.69061e+10	1.69716e+10	1.48263e+10	1.56685e+10	1.5902e+10	1.20151e+10	1.16673e+10	1.25176e+10	1.26561e+10	1.13218e+10	1.15104e+10	2.23786e+10	2.19366e+10	2.28599e+10	2.29955e+10	2.19821e+10	2.24671e+10
30	PE 36:6		60	C41 H70 N O8 P	pos	18.589	736.492	M+H	PE	852867	865366	665033	563755	736111	931544	451854	407759	404257	570057	358190	559033	3.17179e+06	3.54382e+06	3.12959e+06	3.02422e+06	2.60477e+06	2.51943e+06
31	PE 34:4		60.4	C39 H70 N O8 P	pos	19.441	712.49	M+H	PE	5.51888e+06	5.34454e+06	6.59274e+06	5.20026e+06	4.83851e+06	5.45448e+06	1.81074e+06	1.33178e+06	1.76035e+06	1.5637e+06	1.0328e+06	1.25815e+06	1.32518e+07	1.3463e+07	1.76294e+07	1.46624e+07	1.45661e+07	1.6657e+07
32	PE 34:3		62.1	C39 H72 N O8 P	pos	20.059	714.505	M+H	PE	2.12556e+06	2.39645e+06	2.18558e+06	2.08142e+06	2.04199e+06	2.08179e+06	2.3936e+06	2.43648e+06	2.24534e+06	2.31484e+06	2.29828e+06	2.16832e+06	6.00216e+06	6.77325e+06	6.12718e+06	6.26984e+06	5.02853e+06	5.1238e+06
33	LPC 18:3		67.7	C26 H48 N O7 P	pos	9.868	518.325	M+H	LPC	35835.4	41697.7	59885.7	40510.8	46996.7	50225.2	73157.4	53654.7	63712.6	61379.8	55789.5	79088.7	50117.4	79918.4	55794.3	57856	55925.2	52740.2
34	LPC 18:2		62.3	C26 H50 N O7 P	pos	10.579	520.34	M+H	LPC	506027	468961	432729	488965	496916	475042	384968	409023	462920	486499	351458	379722	387999	361056	474483	394743	397806	492402
35	LPC 18:1		60.6	C26 H52 N O7 P	pos	14.818	522.356	M+H	LPC	1.09039e+10	1.17552e+10	1.1375e+10	1.21325e+10	1.15117e+10	1.10704e+10	6.60343e+09	6.56852e+09	6.96564e+09	7.07733e+09	6.69569e+09	6.25025e+09	1.56825e+10	1.5846e+10	1.52528e+10	1.50442e+10	1.48733e+10	1.45003e+10
36	LPE 18:3		68.1	C23 H42 N O7 P	pos	12.549	476.277	M+H	LPE	5.36246e+07	5.36317e+07	5.443e+07	5.48188e+07	5.06162e+07	5.58369e+07	3.41457e+07	3.60299e+07	3.34299e+07	3.36893e+07	3.49964e+07	3.31738e+07	1.66847e+08	1.90801e+08	2.13884e+08	2.04067e+08	1.90083e+08	1.89714e+08
37	Cer-NS d36:3		66.4	C36 H67 N O3	pos	22.13	562.52	M+H	Cer	3.68358e+06	3.3611e+06	3.29421e+06	3.61287e+06	3.85119e+06	3.15693e+06	6.42949e+06	7.64028e+06	6.1865e+06	5.37033e+06	4.10361e+06	6.35121e+06	89608.5	211018	41024.4	103567	381144	3.83318e+06
38	Cer-NS d34:3		65.2	C34 H63 N O3	pos	21.12	534.488	M+H	Cer	1.60458e+07	1.41003e+07	1.34401e+07	1.5023e+07	1.31046e+07	6.45882e+06	2.31229e+07	2.25747e+07	2.81613e+07	2.48616e+07	2.35348e+07	2.92277e+07	2.85708e+07	620517	2.0651e+07	688531	1.03062e+07	2.66875e+07
39	Phenylethylamide 359		72.8	C24 H41 N O	pos	19.171	360.326	M+H	FA	3.41704e+06	3.02223e+06	2.83615e+06	4.22302e+06	1.80572e+07	3.48062e+06	6.81005e+06	8.63015e+06	1.17729e+07	1.08605e+07	1.16762e+07	7.3619e+06	6.1166e+06	1.23656e+07	4.86715e+06	8.72959e+06	6.97839e+06	2.05167e+07
40	Oleoyl ethanolamide	95.2		C20 H39 N O2	pos	12.413	326.306	M+H	FA	34133.6	34797.2	32640.6	33256.5	35703	35174.8	165344	178105	42375.5	108315	144092	108112	141874	133202	126607	122580	119576	98550.3
41	Oleamide	87.1		C18 H35 N O	pos	17.558	282.28	M+H	FA	6.73141e+06	6.75487e+06	7.13202e+06	7.9649e+06	2.42288e+07	7.13057e+06	8.7197e+06	1.20819e+07	1.31924e+07	1.22273e+07	1.0127e+07	9.99841e+06	2.43215e+07	2.41645e+07	2.43637e+07	2.44872e+07	2.33817e+07	3.06139e+07
42	Erucamide		81.6	C22 H43 N O	pos	14.416	338.342	M+H	FA	3.32583e+06	3.45177e+06	3.39722e+06	3.0182e+06	3.25978e+06	3.31361e+06	2.89549e+06	2.73162e+06	2.73885e+06	2.85453e+06	2.7436e+06	2.68033e+06	4.35363e+06	4.2744e+06	4.27148e+06	4.33644e+06	4.28427e+06	4.3573e+06
43	12-Oxo phytodienoic acid	88.7		C18 H28 O3	pos	8.762	275.201	M+H	FA	1.29666e+08	8.33706e+07	8.04027e+07	1.09831e+08	8.0806e+07	1.18139e+08	1.24614e+08	1.30817e+08	1.631e+08	1.66635e+08	2.00355e+08	1.53821e+08	1.13544e+08	1.13195e+08	8.47207e+07	1.19561e+08	7.12528e+07	1.34478e+08
44	Avocadene 2-acetate	75.5		C19 H36 O4	pos	10.725	351.253	M+Na	FA	3.1221e+08	2.85534e+08	3.06237e+08	1.25061e+09	1.11823e+09	1.11396e+09	1.49599e+08	1.38578e+08	5.48135e+08	5.62953e+08	5.56005e+08	5.06381e+08	1.24589e+09	1.27764e+09	1.27171e+09	1.03517e+09	1.21664e+09	3.34401e+08
45	Palmitoleic acid	60.7		C16 H30 O2	pos	10.112	277.216	M+Na	FA	2.55427e+06	2.77294e+06	3.01163e+06	2.15588e+06	7.76093e+06	3.03887e+06	5.26949e+06	5.86596e+06	4.37193e+06	5.58009e+06	4.9535e+06	4.80872e+06	1.18424e+06	1.39615e+06	1.37187e+06	1.36791e+06	988764	1.44253e+06
46	Palmitic acid	81.8		C16 H32 O2	pos	10.764	274.274	+NH4	FA	2.00469e+07	280455	1.09264e+07	113191	7.47314e+06	339836	6.25731e+06	3.65291e+06	125907	147616	168310	757623	9.92532e+08	2.51547e+08	7.63726e+08	2.98634e+08	8.36749e+08	436682
47	Octadec-9-ynoic acid	76.8		C18 H32 O2	pos	16.727	298.274	+NH4	FA	5.82993e+06	5.76384e+06	5.78374e+06	6.99436e+06	9.38051e+06	5.64552e+06	7.17343e+06	8.34643e+06	1.11925e+07	9.83746e+06	1.06053e+07	7.27208e+06	6.64127e+06	8.25545e+06	5.73173e+06	8.75299e+06	6.40938e+06	1.25973e+07
48	Dihomo-gamma-linolenic acid	69.7		C20 H34 O2	pos	8.532	307.264	M+H	FA	3.93757e+06	3.25426e+06	2.09907e+06	3.80915e+06	2.18898e+06	3.46446e+06	8.90799e+06	1.18788e+07	9.78588e+06	1.12527e+07	9.58625e+06	6.39232e+06	4.86951e+06	1.99186e+06	2.4689e+06	5.82748e+06	2.41838e+06	2.43238e+06
49	Arachidonic acid	68.9		C20 H32 O2	pos	12.723	305.243	M+H	FA	1.3426e+06	1.71305e+06	1.30852e+06	1.49398e+06	1.23405e+06	1.26929e+06	2.91463e+06	5.54377e+06	6.16421e+06	5.95982e+06	6.82791e+06	4.28814e+06	1.89742e+06	1.51391e+06	2.00838e+06	1.76582e+06	1.51725e+06	2.14033e+06
50	9-Oxo-ODE	74.4		C18 H30 O3	pos	12.967	295.225	M+H	FA	1.35212e+06	1.33327e+06	1.35546e+06	4.56871e+06	3.50335e+06	1.11914e+06	803237	710971	310545	550126	1.34166e+06	1.09695e+06	2.6523e+06	918672	323627	783729	909057	588741
51	9-Oxo-10,12-octadecadienoic acid	93.2		C18 H30 O3	pos	14.544	295.227	M+H	FA	3.49949e+08	3.59799e+08	3.64004e+08	3.69053e+08	3.76075e+08	3.48341e+08	4.28893e+08	4.60863e+08	4.49205e+08	4.3552e+08	4.33466e+08	4.27753e+08	4.31538e+08	3.99088e+08	3.98026e+08	3.97505e+08	3.66869e+08	3.81904e+08
52	18-HETE	70.6		C20 H32 O3	pos	15.695	321.244	M+H	FA	3.54188e+06	3.44692e+06	2.60442e+06	5.44507e+06	2.65764e+07	4.18147e+06	4.2107e+06	5.85064e+06	1.29144e+07	8.91435e+06	8.63234e+06	6.16954e+06	2.70729e+06	7.86602e+06	1.29919e+06	6.40767e+06	2.6791e+06	2.04821e+07
53	9,10,13-Trihydroxyoctadeca-11,15-dienoic acid	92.5		C18 H32 O5	pos	7.582	351.215	M+Na	FA	261542	266146	258769	259177	259501	266996	287833	303864	811996	309795	301835	296286	330687	372846	359435	354166	358954	337908
54	Stearoyl ethanolamide	94.3		C20 H41 N O2	pos	13.177	328.321	M+H	FA	101744	98333.6	112744	113208	100430	112225	48176.5	52050	62594.8	56487.3	55192.9	48098.3	62869.7	64630.1	63013	61637.7	62256.3	70305.5
55	Trans-3-Indoleacrylic acid	72.7		C11 H9 N O2	pos	5.666	188.071	M+H	Organic acid	2.3824e+07	5.74101e+06	2.56685e+07	2.83264e+07	2.34437e+07	2.33952e+07	3.67487e+07	7.88858e+06	9.70118e+06	3.64544e+07	5.52673e+06	1.90582e+07	7.40441e+07	7.44382e+07	6.51386e+07	7.93955e+07	7.73693e+07	7.58876e+07
56	Picolinic acid	81.3	83.7	C6 H5 N O2	pos	0.749	124.04	M+H	Organic acid	2.93853e+08	3.21231e+08	9.21554e+07	6.14514e+07	3.44092e+08	3.56236e+08	2.98335e+08	3.27676e+08	3.20823e+08	3.96656e+07	3.20434e+08	5.45743e+07	3.84672e+07	5.16019e+07	4.01587e+07	3.74671e+07	4.4292e+07	3.28838e+07
57	Penicillic acid	84.9		C8 H10 O4	pos	3.303	171.065	M+H	Organic acid	1.16173e+09	1.1794e+09	7.77753e+08	1.18829e+09	1.31172e+09	1.27449e+09	5.97324e+08	8.05894e+08	8.84278e+08	7.20898e+07	1.86969e+07	1.38809e+09	2.20684e+07	2.82506e+07	2.84562e+07	1.50417e+07	3.32726e+07	2.52863e+07
58	4-Coumaric acid	66.6	74.8	C9 H8 O3	pos	4.911	165.055	M+H	Organic acid	7.22004e+06	1.01855e+07	7.28649e+06	8.93138e+06	8.51865e+06	8.15397e+06	4.82473e+06	5.04036e+06	5.7677e+06	5.59578e+06	1.13298e+07	5.56613e+06	1.36106e+07	1.50566e+07	1.42686e+07	1.50691e+07	1.4573e+07	1.64022e+07
59	Kynurenic acid	77.3		C10 H7 N O3	pos	0.819	190.05	M+H	Organic acid	7.14078e+07	7.13842e+07	6.91132e+07	6.72375e+07	7.00092e+07	7.80206e+07	1.91204e+08	1.73786e+08	1.52201e+08	1.6942e+08	2.77088e+08	1.62215e+08	3.74289e+07	3.43507e+07	3.3313e+07	3.7781e+07	3.61242e+07	3.40311e+07
60	Indole-3-acetic acid	63.1		C10 H9 N O2	pos	0.896	176.071	M+H	Organic acid	3.09581e+07	8.1709e+06	2.23133e+07	3.045e+07	6.27314e+06	2.00576e+07	8.77862e+07	4.53231e+07	8.18633e+07	6.56578e+07	7.67659e+06	9.73414e+07	2.82069e+06	718480	3.77441e+06	1.11011e+06	3.25223e+06	2.56493e+06
61	Methyl cinnamate	82.4		C10 H10 O2	pos	6.493	163.076	M+H	Organic acid	1.17204e+08	8.26122e+07	1.19065e+08	1.15488e+08	1.15343e+08	1.13585e+08	1.90677e+07	1.83092e+07	2.35589e+07	1.56227e+07	1.98674e+07	2.20477e+07	1.09335e+08	1.08002e+08	1.10746e+08	1.07681e+08	1.11307e+08	1.05355e+08
62	3-Hydroxypicolinic acid	72.7		C6 H5 N O3	pos	0.77	140.034	M+H	Organic acid	3.88943e+07	4.98332e+07	4.71742e+07	6.31931e+07	4.79572e+07	3.58013e+07	1.40435e+08	1.59634e+08	1.61927e+08	1.48229e+08	2.01745e+08	1.68655e+08	8.33981e+06	9.04892e+06	7.86985e+06	7.67014e+06	1.01934e+07	6.66025e+06
63	Sphingosine	91.6	73.3	C18 H37 N O2	pos	13.166	300.291	M+H	Organic amine	3.73251e+06	3.57854e+06	4.1666e+06	3.70125e+06	3.09919e+06	3.79221e+06	1.66714e+07	1.57376e+07	1.56106e+07	1.67581e+07	1.59347e+07	1.45078e+07	8.71133e+06	8.36246e+06	9.6418e+06	8.27262e+06	7.48633e+06	6.50586e+06
64	Sphinganine		79.4	C18 H39 N O2	pos	10.428	302.306	M+H	Organic amine	146853	153285	131971	147495	153408	148575	216751	179589	187079	177607	185219	172846	190390	205948	205147	200838	212443	196629
65	Phosphocholine		65.9	C5 H14 N O4 P	pos	14.068	184.074	M+H	Organic amine	2.98376e+07	3.08387e+07	2.97645e+07	3.28285e+07	2.94912e+07	3.1821e+07	1.47401e+07	1.49381e+07	1.67922e+07	1.55315e+07	1.60887e+07	1.50881e+07	5.98825e+07	5.43789e+07	5.66896e+07	5.58086e+07	5.79728e+07	5.5988e+07
66	N-Acetylputrescine	71.5		C6 H14 N2 O	pos	0.658	131.118	M+H	Organic amine	1.76243e+08	1.66868e+08	1.60759e+08	1.63835e+08	1.59861e+08	1.5901e+08	2.02963e+08	1.81212e+08	1.54148e+08	1.60276e+08	2.37053e+08	1.62096e+08	2.08414e+08	1.83536e+08	1.77171e+08	2.02119e+08	1.72301e+08	2.00271e+08
67	L-Carnitine	95.4	69.9	C7 H15 N O3	pos	0.691	162.113	M+H	Organic amine	7.79198e+08	8.11926e+08	8.15456e+08	9.10668e+08	7.9111e+08	8.34521e+08	8.9662e+08	9.60855e+08	8.06614e+08	8.47384e+08	9.80552e+08	9.49629e+08	2.07318e+08	2.4317e+08	2.15434e+08	2.21119e+08	1.91435e+08	2.62701e+08
68	Caprolactam	89.4		C6 H11 N O	pos	2.895	114.092	M+H	Organic amine	1.80746e+07	1.61265e+07	1.47263e+07	1.52708e+07	1.77846e+07	1.56076e+07	2.16038e+07	1.792e+07	2.18234e+07	1.90886e+07	2.17301e+07	1.50211e+07	1.77098e+07	1.85172e+07	1.83605e+07	1.80459e+07	1.73879e+07	1.80414e+07
69	2-Amino-1,3,4-octadecanetriol	64.7	78	C18 H39 N O3	pos	12.689	318.3	M+H	Organic amine	2.15972e+08	2.21283e+08	2.19048e+08	2.27085e+08	2.21017e+08	2.06613e+08	5.7941e+08	6.41517e+08	6.27689e+08	6.05148e+08	5.91641e+08	5.78828e+08	3.52902e+08	3.43018e+08	3.55756e+08	3.50455e+08	3.5137e+08	3.35354e+08
70	Asperphenamate		94.4	C32 H30 N2 O4	pos	10.203	507.228	M+H	Organic amine	233685	243821	232256	194718	206948	185754	279657	253824	214271	211172	213006	195300	967663	962022	672509	785918	881089	617061
71	Theanine		92.2	C7 H14 N2 O3	pos	0.696	175.108	M+H	Amino acid	5.27716e+09	5.3822e+09	5.21743e+09	5.84092e+09	5.26056e+09	5.4606e+09	2.12475e+09	1.87796e+09	1.75719e+09	1.94903e+09	1.85789e+09	1.84655e+09	3.77749e+10	3.95745e+10	4.03219e+10	4.04117e+10	3.86266e+10	3.94497e+10
72	Prolylleucine	81.1		C11 H20 N2 O3	pos	4.152	229.155	M+H	Amino acid	868373	1.06823e+06	912459	952986	1.03709e+06	901354	1.01835e+06	1.13703e+06	1.08324e+06	1.21375e+06	2.32848e+06	966634	956358	999884	1.0321e+06	1.05464e+06	1.05324e+06	1.16944e+06
73	Proline	91	81.9	C5 H9 N O2	pos	0.69	116.071	M+H	Amino acid	8.3776e+08	8.69149e+08	8.58782e+08	8.7304e+08	8.33458e+08	8.74403e+08	1.45241e+09	1.2362e+09	1.1423e+09	1.24836e+09	1.59235e+09	1.2536e+09	1.54127e+09	1.30378e+09	1.57182e+09	1.3883e+09	1.40956e+09	1.3476e+09
74	N-Acetylornithine	74.2	91.6	C7 H14 N2 O3	pos	0.644	175.108	M+H	Amino acid	2.95191e+09	3.20948e+09	3.05788e+09	3.68399e+09	3.19958e+09	3.33354e+09	1.48514e+08	4.1135e+08	4.79547e+08	5.3478e+08	4.89132e+08	3.93744e+08	2.6066e+10	2.7364e+10	2.77087e+10	2.82071e+10	2.66303e+10	2.76308e+10
75	N6,N6,N6-Trimethyl-lysine	87.2	76.4	C9 H20 N2 O2	pos	0.686	189.16	M+H	Amino acid	3.8644e+07	4.21077e+07	4.67267e+07	4.97512e+07	4.35959e+07	4.6023e+07	1.92537e+07	2.10692e+07	1.67969e+07	1.86044e+07	2.36074e+07	1.20422e+07	1.35885e+07	9.32551e+06	7.8513e+06	1.03553e+07	8.24985e+06	2.55227e+07
76	Arginine	86.3	89.7	C6 H14 N4 O2	pos	0.59	175.119	M+H	Amino acid	1.14085e+07	1.19797e+07	1.03178e+07	1.06374e+07	1.19672e+07	1.23212e+07	1.36367e+07	1.99774e+07	1.90152e+07	1.67397e+07	1.97953e+07	1.92416e+07	3.43783e+08	2.54728e+08	2.63145e+08	2.9061e+08	2.90189e+08	3.66732e+08
77	Pyroglutamic acid	84.4	60	C5 H7 N O3	pos	0.84	130.05	M+H	Amino acid	2.12248e+08	1.8982e+08	2.16292e+08	1.03211e+08	1.88865e+08	1.89229e+08	2.23062e+08	2.44536e+08	2.54826e+08	2.19726e+08	2.69192e+08	2.43299e+08	7.09961e+07	1.0969e+08	5.81344e+08	5.40544e+08	6.66527e+07	5.4823e+08
78	Betaine	72.2	87	C5 H11 N O2	pos	0.696	118.087	M+H	Amino acid	5.4549e+09	6.22101e+09	6.09798e+09	5.96989e+09	6.07649e+09	6.37599e+09	7.95943e+09	8.48238e+09	7.86418e+09	8.00553e+09	8.14795e+09	7.72479e+09	9.53784e+08	1.01688e+09	2.37743e+08	1.04552e+09	9.03537e+08	1.24683e+09
79	Vindoline	81.7		C25 H32 N2 O6	pos	14.705	457.234	M+H	Alkaloid	3.25565e+07	3.93648e+07	3.76601e+07	4.19197e+07	4.11598e+07	4.09971e+07	1.40364e+07	2.26432e+07	2.04347e+07	2.18309e+07	2.22468e+07	2.44659e+07	2.63342e+07	2.32591e+07	3.04901e+07	3.15167e+07	2.52358e+07	3.09572e+07
80	Tomatidine	87.5		C27 H45 N O2	pos	7.528	416.349	M+H	Alkaloid	1.77202e+07	1.67542e+07	1.84079e+07	1.87331e+07	1.63693e+07	1.55978e+07	607980	638024	567409	706565	454848	693781	93124.4	91311.2	92855.8	94747.1	97895.9	106965
81	Theobromine	94.6	83.2	C7 H8 N4 O2	pos	3.596	181.072	M+H	Alkaloid	1.0169e+08	3.67541e+06	9.7605e+07	1.06925e+08	1.18805e+08	3.14832e+06	1.13273e+08	1.28361e+08	1.30033e+08	1.25769e+08	1.54409e+08	1.23971e+08	8.84474e+07	1.04319e+08	1.19738e+08	1.09142e+08	1.16449e+08	1.15936e+08
82	Reserpine	83.7		C33 H40 N2 O9	pos	15.911	609.271	M+H	Alkaloid	1.54396e+08	2.19723e+08	2.14251e+08	1.98628e+08	2.00378e+08	1.92699e+08	1.35199e+08	1.37755e+08	1.34261e+08	1.28012e+08	1.16327e+08	1.48351e+08	1.22961e+07	1.11898e+07	2.03129e+06	1.35747e+07	1.19317e+07	3.06724e+08
83	Rescinnamine	67.7		C35 H42 N2 O9	pos	17.267	635.287	M+H	Alkaloid	5.10855e+06	4.7927e+06	5.63966e+06	4.84017e+06	4.51918e+06	4.87358e+06	8.76473e+06	9.92217e+06	7.94097e+06	7.99131e+06	7.56026e+06	8.43999e+06	292359	621587	124491	62604.8	78211.4	9.2358e+06
84	Quinoline	63.9		C9 H7 N	pos	5.716	130.065	M+H	Alkaloid	2.83936e+07	2.65619e+07	2.22062e+07	2.6214e+07	2.71496e+07	2.12922e+07	3.09444e+07	3.62311e+07	3.21458e+07	3.13473e+07	3.94758e+06	3.2578e+07	6.73198e+07	7.13215e+07	6.75148e+07	7.14651e+07	7.22681e+07	7.01506e+07
85	Neoechinulin A		82.2	C19 H21 N3 O2	pos	8.59	324.171	M+H	Alkaloid	2.37864e+08	2.38355e+08	2.40636e+08	2.36807e+08	2.30008e+08	2.27438e+08	7.29409e+06	7.5056e+06	7.17349e+06	7.32323e+06	7.7758e+06	7.39369e+06	73937.2	82798.7	161123	97508	85141.7	416425
86	Caffeine	98.3	82.3	C8 H10 N4 O2	pos	0.95	195.088	M+H	Alkaloid	5.83115e+09	2.57068e+09	2.85236e+09	4.20698e+09	2.64923e+09	3.22328e+09	1.05735e+10	3.29415e+09	9.05075e+09	3.62706e+09	2.59034e+09	9.71176e+09	2.63282e+09	6.62685e+09	1.27196e+10	8.55007e+09	6.37203e+09	7.48756e+09
87	Keracyanin	62.3		C27 H30 O15	pos	13.704	595.177	M+H	Catechin	155994	155275	136279	145218	149125	127916	120874	134321	124532	125919	131371	125483	1.32342e+06	1.2667e+06	1.30358e+06	1.25229e+06	1.29469e+06	325058
88	Epicatechin 8-C-beta-glucopyranoside		73.5	C21 H24 O11	pos	4.258	453.14	M+H	Catechin	2.5232e+06	2.93232e+06	3.42391e+06	2.54673e+06	2.72075e+06	2.5335e+06	9.20948e+06	8.62298e+06	1.2743e+07	9.49037e+06	8.4349e+06	4.83054e+06	5.28866e+06	5.04991e+06	5.86647e+06	6.10175e+06	3.08958e+06	3.25319e+06
89	Catechin gallate	97.5	86.4	C22 H18 O10	pos	5.716	443.097	M+H	Catechin	1.62387e+10	1.49191e+10	1.41197e+10	1.66119e+10	1.14804e+10	1.31049e+10	1.19421e+09	1.20581e+09	1.19773e+09	1.02953e+09	8.85257e+08	1.19639e+09	8.59423e+08	1.06118e+09	9.05898e+08	7.38724e+07	6.5778e+08	2.89687e+10
90	4"-O-methyl-EGCG		87.5	C23 H20 O11	pos	5.382	473.108	M+H	Catechin	1.59492e+09	1.43352e+09	1.20252e+09	1.28075e+09	1.42028e+09	1.4531e+09	6.08808e+06	9.98952e+06	4.46337e+06	1.19187e+07	1.19169e+07	6.15952e+06	2.65294e+08	5.78979e+06	1.19261e+07	3.38921e+08	3.42897e+08	3.25917e+08
91	Trifolin	95.5	95	C21 H20 O11	pos	6.093	449.109	M+H	Flavonoid	1.16628e+09	1.12087e+09	1.15579e+09	1.15309e+09	1.17082e+09	1.14298e+09	2.48262e+08	3.295e+08	3.07348e+08	2.96821e+08	2.94164e+08	3.1565e+08	4.30007e+09	4.45546e+09	4.37308e+09	4.32394e+09	4.45785e+09	1.71554e+09
92	Teadenol A		63.7	C14 H12 O6	pos	4.61	277.069	M+H	Flavonoid	4.41046e+07	4.68285e+07	5.23275e+07	5.37061e+07	4.36208e+07	2.10793e+07	6.34301e+07	1.03324e+08	6.0882e+07	5.89331e+07	6.2078e+07	5.31934e+07	2.71886e+07	2.06743e+07	2.48921e+07	2.90834e+07	1.99405e+07	2.67236e+07
93	Rutin	99	89.4	C27 H30 O16	pos	5.76	611.162	M+H	Flavonoid	1.63806e+07	3.40047e+09	1.59589e+07	1.41726e+07	3.47769e+09	1.03387e+07	4.00957e+06	1.51784e+09	1.06072e+07	4.10493e+06	1.24299e+09	4.40742e+06	1.45277e+07	895373	1.76916e+07	7.50505e+06	1.45575e+07	5.18768e+07
94	Rhamnetin	69.5		C16 H12 O7	pos	6.297	317.066	M+H	Flavonoid	1.9901e+07	1.04753e+07	2.52391e+07	2.75394e+07	1.51581e+07	2.34227e+07	2.23071e+07	1.81631e+07	1.68262e+07	1.31084e+07	1.98392e+07	1.63721e+07	3.91445e+07	3.93349e+07	3.48734e+07	3.99803e+07	3.90993e+07	1.20295e+07
95	Quercitrin	93	80.6	C21 H20 O11	pos	7.062	449.109	M+H	Flavonoid	6.51086e+07	6.67974e+07	6.31241e+07	6.25975e+07	5.50179e+07	5.3656e+07	5.45766e+07	5.52098e+07	5.07005e+07	5.06489e+07	6.99004e+07	5.05269e+07	2.62825e+08	2.4591e+08	2.65975e+08	2.60851e+08	2.02709e+08	2.36724e+08
96	Quercetin	98.1	75	C15 H10 O7	pos	7.424	303.05	M+H	Flavonoid	3.01625e+08	3.31173e+08	3.28427e+08	3.13386e+08	3.11937e+08	3.19809e+08	1.86287e+08	1.58968e+08	1.72033e+08	2.03214e+08	1.66334e+08	1.56199e+08	2.07085e+08	2.28668e+08	2.28417e+08	2.19197e+08	2.43063e+08	2.12608e+08
97	Naringin dihydrochalcone	63.5		C27 H34 O14	pos	10.097	605.191	M+Na	Flavonoid	4.52617e+06	2.50579e+06	4.10775e+06	4.3204e+06	2.79171e+06	2.1168e+06	1.70885e+06	1.85936e+06	2.46615e+06	862536	249667	2.25478e+06	1.36957e+07	7.11417e+06	1.16763e+07	9.23372e+06	1.147e+07	9.12905e+06
98	Myricetin-3-rutinoside		83	C27 H30 O17	pos	5.126	627.157	M+H	Flavonoid	4.15039e+06	7.98045e+06	4.74022e+06	594894	727250	4.51421e+06	1.85761e+06	640834	1.21892e+06	1.21008e+06	5.23605e+07	609042	6.38441e+06	9.90321e+06	9.75978e+06	7.40572e+06	8.02283e+06	6.78095e+06
99	Myricetin	98.3	60.5	C15 H10 O8	pos	4.632	319.045	M+H	Flavonoid	2.5955e+09	6.86305e+07	2.4989e+09	2.48989e+09	6.48276e+07	2.53343e+09	4.07991e+08	3.70412e+07	4.11215e+08	3.17659e+07	7.24772e+06	4.15473e+08	2.87945e+09	2.91358e+09	2.90223e+09	2.97037e+09	3.51975e+09	3.52795e+09
100	Genistein	84.4		C15 H10 O5	pos	6.462	271.061	M+H	Flavonoid	1.97455e+06	3.14024e+06	1.81486e+06	3.44628e+06	5.75272e+06	2.05741e+06	2.34283e+07	3.16046e+07	2.7914e+07	3.09354e+07	3.78127e+07	1.56031e+07	2.5004e+06	5.89095e+06	5.53243e+06	5.68766e+06	5.48175e+06	7.00776e+06
101	Fuzhuanin A		74.2	C15 H12 O8	pos	2.644	321.06	M+H	Flavonoid	3.70401e+06	5.43104e+06	3.7439e+06	3.75962e+06	4.25688e+06	4.99153e+06	3.77866e+06	4.8367e+06	4.04233e+06	5.03748e+06	6.17742e+06	4.00704e+06	7.04268e+06	3.04095e+06	5.57142e+06	6.05752e+06	6.83174e+06	5.625e+06
102	Chafuroside A		77	C21 H18 O9	pos	6.545	415.103	M+H	Flavonoid	4.82062e+07	4.61182e+07	4.5828e+07	5.04232e+07	4.78312e+07	4.84281e+07	3.70846e+07	4.4024e+07	4.67607e+07	3.56981e+07	5.00026e+07	4.0006e+07	2.14127e+07	2.05027e+07	1.98182e+07	2.64498e+07	2.26326e+07	2.10882e+07
103	Camelliquercetiside C		88.8	C41 H44 O22	pos	7.102	889.243	M+H	Flavonoid	3.25365e+06	1.66892e+06	1.66095e+06	3.31875e+06	2.95123e+06	3.17448e+06	4.44937e+07	4.19829e+07	4.0568e+07	4.1926e+07	4.76651e+07	4.2792e+07	5.43941e+07	5.53428e+07	5.74008e+07	5.54829e+07	5.84172e+07	5.13092e+07
104	Camellikaempferoside A		87.2	C41 H44 O21	pos	7.41	873.245	M+H	Flavonoid	4.40117e+06	4.64333e+06	4.00227e+06	4.41985e+06	3.69321e+06	4.44211e+06	3.9933e+07	3.84285e+07	3.84808e+07	3.81946e+07	3.79707e+07	4.12092e+07	635378	6.83959e+06	277396	348874	800677	5.61151e+07
105	Citral	77.6		C10 H16 O	pos	6.465	153.128	M+H	Terpenoid	6.93671e+07	8.63353e+07	9.41319e+07	7.00144e+07	6.98827e+07	8.61331e+07	4.03161e+07	3.72389e+07	3.70935e+07	3.76568e+07	4.09783e+07	3.94804e+07	9.8986e+08	1.02558e+09	1.02535e+09	1.02632e+09	9.98941e+08	1.67157e+08
106	Betulin	66.8		C30 H50 O2	pos	20.157	443.39	M+H	Terpenoid	2.06785e+06	2.67206e+06	2.98044e+06	2.30449e+06	2.2494e+06	2.05002e+06	8.36243e+06	6.98403e+06	6.72095e+06	8.17461e+06	5.88368e+06	7.08035e+06	5.12428e+06	3.86098e+06	4.17074e+06	4.0232e+06	3.42725e+06	3.41149e+06
107	Andrographolide	72.2		C20 H30 O5	pos	9.179	351.215	M+H	Terpenoid	6.23002e+06	6.45519e+06	6.11869e+06	5.63237e+06	5.87015e+06	5.45178e+06	7.1686e+06	8.2481e+06	7.55833e+06	8.80664e+06	8.72341e+06	8.55467e+06	6.56854e+06	6.40073e+06	1.15512e+07	8.24908e+06	6.17491e+06	3.05404e+06
108	Esculetin	65.8		C9 H6 O4	pos	4.177	179.034	M+H	Coumarin	379823	1.47282e+06	1.1951e+06	2.00595e+06	1.18059e+06	1.3298e+06	1.54846e+06	1.64438e+06	1.37092e+06	513032	1.87427e+06	1.12648e+06	2.69237e+06	2.1523e+06	1.34666e+06	2.5628e+06	1.96798e+06	2.10716e+06
109	Ouabain	67.6		C29 H44 O12	pos	14.008	623.248	M+K	Steroid	1.09616e+07	1.33021e+07	1.55616e+07	1.12449e+07	1.6116e+07	1.20055e+07	6.19569e+06	6.75732e+06	8.30725e+06	7.50198e+06	6.39725e+06	8.00717e+06	1.47521e+06	591940	1.42481e+06	1.32447e+06	1.04256e+06	8.79398e+06
110	Hypoxanthine	94	64.7	C5 H4 N4 O	pos	0.831	137.046	M+H	Nucleoside	9.08982e+07	1.57109e+08	1.11436e+08	1.0308e+08	1.18204e+08	1.14413e+08	2.72778e+08	3.48467e+08	1.46245e+09	1.55116e+09	4.04328e+08	2.49206e+08	5.98095e+06	5.44821e+06	1.0431e+07	5.79907e+06	5.59275e+06	1.2113e+07
111	Cytosine	92.4	73.1	C4 H5 N3 O	pos	0.691	112.051	M+H	Nucleoside	3.81172e+07	3.35339e+07	3.82565e+07	4.04548e+07	3.57085e+07	4.22903e+07	1.48325e+08	2.46985e+08	2.53577e+08	2.66508e+08	2.59872e+08	2.58288e+08	1.83583e+07	2.13537e+07	1.85267e+07	1.70154e+07	1.34609e+07	1.49667e+07
112	Uracil	81.9	66.4	C4 H4 N2 O2	pos	0.947	113.035	M+H	Nucleoside	1.07519e+06	666763	1.26163e+06	531971	1.97523e+06	2.1071e+06	2.5665e+07	2.47525e+07	2.97205e+06	2.75171e+06	4.57783e+07	2.66344e+06	551895	724597	840533	872137	846387	1.20049e+06
113	Thymine	81.4		C5 H6 N2 O2	pos	1.426	127.05	M+H	Nucleoside	1.53033e+06	797388	1.35345e+06	1.17812e+06	1.42131e+06	1.49925e+06	2.13944e+06	945399	2.06362e+06	2.23228e+06	2.93643e+06	2.37344e+06	1.26523e+06	1.77945e+06	3.07346e+06	1.8701e+06	1.86013e+06	1.66587e+06
114	Adenosine	99.1	91.2	C10 H13 N5 O4	pos	0.683	268.104	M+H	Nucleoside	4.21804e+08	4.36087e+08	4.26635e+08	4.27368e+08	4.0232e+08	4.47906e+08	8.06305e+07	1.07974e+08	8.92907e+07	1.0362e+08	1.18155e+08	7.70326e+07	3.08426e+08	2.69894e+08	3.1532e+08	2.69633e+08	2.79444e+08	2.49513e+08
115	Adenine	87.5	60.3	C5 H5 N5	pos	0.89	136.062	M+H	Nucleoside	1.46683e+08	1.96768e+08	3.07915e+08	3.66146e+08	1.73837e+08	2.55833e+08	5.05711e+08	9.13718e+08	5.70668e+08	5.62527e+08	5.53591e+08	4.85587e+08	4.28618e+07	7.44702e+07	8.22948e+07	5.9365e+07	4.88179e+07	3.52786e+07
116	2'-O-Methyladenosine	93.1		C11 H15 N5 O4	pos	2.325	282.12	M+H	Nucleoside	3.09407e+06	3.45124e+06	2.95904e+06	3.25072e+06	3.5231e+06	3.04603e+06	3.17958e+06	3.86605e+06	3.4401e+06	3.93078e+06	844910	3.3192e+06	3.13802e+06	2.75446e+06	2.56653e+06	2.66667e+06	2.55372e+06	2.97092e+06
117	Pyridoxine	64.9		C8 H11 N O3	pos	14.525	170.082	M+H	Vitamin	472974	538498	288723	298808	568977	415368	355316	445502	718965	486599	333600	384530	359695	568649	308498	427993	514412	555229
118	Pantothenic acid		75.8	C9 H17 N O5	pos	1.9	220.118	M+H	Vitamin	1.20027e+07	1.19336e+07	1.12845e+07	1.20734e+07	1.2396e+07	1.39301e+07	1.3328e+07	1.29873e+07	1.37164e+07	1.26709e+07	7.0438e+06	1.33432e+07	1.23312e+07	1.19183e+07	1.32951e+07	1.34064e+07	1.24414e+07	1.17485e+07
119	Nicotinamide	83	73.4	C6 H6 N2 O	pos	0.71	123.056	M+H	Vitamin	4.28364e+07	4.38706e+07	4.27322e+07	4.59135e+07	4.14549e+07	4.71831e+07	2.00297e+07	4.8523e+06	1.47211e+07	2.05503e+07	1.98113e+07	1.97908e+07	2.30713e+08	2.32812e+08	2.66875e+08	2.40845e+08	2.52393e+08	2.42208e+08
120	4-Hydroxybenzaldehyde	65.9		C7 H6 O2	pos	7.304	123.044	M+H	Phenol	8.63581e+06	8.60351e+06	8.70692e+06	9.18802e+06	8.03656e+06	7.85139e+06	3.26137e+06	6.04286e+06	5.87979e+06	5.71749e+06	6.85576e+06	2.44974e+06	7.81054e+06	7.84109e+06	8.76014e+06	8.57963e+06	9.12203e+06	5.04202e+07
121	Trans-Cinnamaldehyde	63		C9 H8 O	pos	7.214	133.065	M+H	Aldehyde	1.16799e+07	1.23795e+07	1.05468e+07	1.03113e+07	1.20924e+07	1.06012e+07	1.27379e+07	1.50209e+07	1.31885e+07	1.53858e+07	1.3553e+07	1.11508e+07	3.11335e+06	3.05134e+06	3.57519e+06	3.19439e+06	3.59047e+06	2.69983e+06
122	Acetovanillone	69.9		C9 H10 O3	pos	7.317	167.07	M+H	Ketone	2.82892e+07	2.43381e+07	2.90097e+07	2.88138e+07	2.8254e+07	2.64412e+07	2.04285e+07	2.33313e+07	2.28693e+07	2.30432e+07	2.09458e+07	2.15043e+07	7.7362e+06	3.57412e+06	9.08891e+06	9.88582e+06	9.95361e+06	9.27657e+06
123	Acetophenone	64.3	76.8	C8 H8 O	pos	1.072	121.065	M+H	Ketone	3.85292e+06	3.9188e+06	3.44733e+06	3.72675e+06	3.71819e+06	4.21311e+06	3.07135e+06	3.07798e+06	3.0129e+06	2.99346e+06	3.79421e+06	3.0952e+06	3.70462e+06	3.94553e+06	4.71092e+06	4.59343e+06	4.77924e+06	4.22046e+06
124	Loliolide		71.3	C11 H16 O3	pos	6.254	197.117	M+H	Others	6.71413e+08	6.31289e+08	6.52222e+08	6.24727e+08	6.1919e+08	6.64295e+08	3.2691e+08	3.18013e+08	3.4295e+08	3.06972e+08	3.17061e+08	3.29586e+08	1.25514e+09	3.18045e+07	1.608e+07	1.31267e+09	1.25959e+09	1.14456e+09
125	PE 36:5		73.8	C41 H72 N O8 P	neg	20.927	736.492	M-H	PE	5.67512e+06	6.8676e+06	6.80737e+06	7.50661e+06	5.55261e+06	7.37342e+06	1.72369e+06	2.26329e+06	1.91827e+06	2.0804e+06	2.38117e+06	1.71336e+06	2.29066e+07	2.98505e+07	2.99847e+07	2.62778e+07	2.64254e+07	2.12885e+07
126	PE 18:0		61.8	C23 H46 N O8 P	neg	15.113	494.288	M-H	PE	2.30678e+07	2.25608e+07	2.20761e+07	2.21352e+07	2.31606e+07	2.3405e+07	1.2484e+08	1.27972e+08	1.25272e+08	1.30862e+08	1.29076e+08	1.25296e+08	3.76401e+07	3.06307e+07	3.69415e+07	3.34077e+07	3.22336e+07	3.70125e+07
127	LPA 20:1		94	C23 H45 O7 P	neg	17.815	463.283	M-H	LPA	1.00472e+07	9.15957e+06	1.09473e+07	1.06878e+07	9.10616e+06	9.66254e+06	8.75852e+06	9.88355e+06	1.02354e+07	1.11082e+07	1.03052e+07	9.15819e+06	1.27173e+07	1.63071e+07	1.4794e+07	1.38368e+07	8.09938e+06	1.23279e+07
128	LPA 18:3		91.2	C21 H37 O7 P	neg	13.784	431.22	M-H	LPA	3.94595e+07	2.65197e+07	3.24893e+07	4.80739e+07	7.17216e+07	4.61069e+07	2.18104e+08	3.60924e+07	2.13534e+08	2.26634e+08	2.16343e+08	5.02702e+07	8.45267e+07	1.21271e+08	8.58597e+07	8.60633e+07	3.52078e+07	1.24084e+08
129	LPA 18:2		86.9	C21 H39 O7 P	neg	14.588	433.235	M-H	LPA	7.44953e+08	7.2275e+08	8.07449e+08	7.59496e+08	7.1578e+08	6.68136e+08	5.47084e+08	5.65005e+08	5.05435e+08	5.08716e+08	5.33616e+08	5.12257e+08	9.7026e+08	1.17742e+09	1.11597e+09	1.12783e+09	1.02364e+09	1.07178e+09
130	LPA 18:0		83.2	C21 H43 O7 P	neg	17.518	437.266	M-H	LPA	2.34473e+07	2.55681e+07	2.53744e+07	2.6952e+07	2.5078e+07	2.41982e+07	2.70561e+07	2.68846e+07	2.70809e+07	2.73448e+07	2.72263e+07	2.78241e+07	3.44258e+07	5.19725e+07	4.39898e+07	4.71528e+07	4.42101e+07	3.8947e+07
131	LPA 17:1		91.9	C20 H39 O7 P	neg	15.067	421.236	M-H	LPA	2.2365e+07	1.97243e+07	1.95635e+07	2.07027e+07	1.64473e+07	1.67917e+07	2.558e+06	2.86426e+06	2.84568e+06	2.57225e+06	2.52324e+06	2.77928e+06	1.82153e+06	2.52399e+06	1.58605e+06	2.41589e+06	1.95075e+06	1.37284e+06
132	LPA 16:1		86.3	C19 H37 O7 P	neg	13.974	407.219	M-H	LPA	1.14433e+07	1.14704e+07	1.15721e+07	6.99305e+06	9.6423e+06	1.02554e+07	2.75263e+06	2.9863e+06	3.22387e+06	2.90702e+06	2.84556e+06	2.75258e+06	4.31269e+06	5.85748e+06	5.59688e+06	5.96354e+06	9.999e+06	9.37836e+06
133	LPA 16:0		87.4	C19 H39 O7 P	neg	15.088	409.235	M-H	LPA	4.10605e+07	4.66663e+07	3.80586e+07	4.36716e+07	4.24861e+07	3.8691e+07	2.91669e+07	3.52387e+07	3.57036e+07	3.05567e+07	3.2108e+07	3.40249e+07	4.23735e+07	5.82647e+07	5.04246e+07	5.10514e+07	4.4151e+07	4.95727e+07
134	LPC 17:0		81.5	C25 H52 N O7 P	neg	15.216	554.346	M+COOH	LPC	2.87985e+06	2.6962e+06	2.47718e+06	2.80065e+06	2.69873e+06	2.58624e+06	3.28573e+06	3.22344e+06	3.39312e+06	3.15825e+06	3.20735e+06	2.83204e+06	9.87335e+06	1.2917e+07	1.05719e+07	1.02592e+07	9.00466e+06	8.30318e+06
135	LPC 16:0		76.6	C24 H50 N O7 P	neg	14.03	540.33	M+COOH	LPC	4.57053e+07	4.78736e+07	4.68613e+07	4.86442e+07	4.03675e+07	4.06082e+07	4.02225e+07	4.472e+07	4.07049e+07	3.48617e+07	3.70084e+07	3.59276e+07	1.21611e+08	1.76069e+08	1.4223e+08	1.35761e+08	1.07439e+08	1.10768e+08
136	LPE 20:0		72.2	C25 H52 N O7 P	neg	17.658	508.34	M-H	LPE	622417	565700	539528	546462	650269	474263	1.39718e+06	1.18174e+06	1.09534e+06	1.24876e+06	1.02934e+06	1.08689e+06	2.41697e+06	2.93831e+06	2.36289e+06	2.52441e+06	2.37082e+06	2.38167e+06
137	LPE 19:1		71.2	C24 H48 N O7 P	neg	15.647	492.309	M-H	LPE	6.77235e+06	6.66729e+06	5.88515e+06	6.53104e+06	5.77417e+06	5.47054e+06	757215	765159	703973	695704	687591	634894	365862	181434	115817	113148	93376.8	291285
138	LPE 18:1		71.7	C23 H46 N O7 P	neg	14.715	478.293	M-H	LPE	7.10251e+07	6.28132e+07	5.4366e+07	7.19132e+07	5.33341e+07	5.66134e+07	5.60418e+07	6.465e+07	5.33337e+07	5.15749e+07	5.46208e+07	4.9864e+07	1.76695e+08	2.3015e+08	1.9129e+08	1.95385e+08	1.5286e+08	1.74314e+08
139	LPE 17:0		72.3	C22 H46 N O7 P	neg	15.159	466.293	M-H	LPE	1.97054e+06	1.66945e+06	1.60198e+06	1.83596e+06	1.75951e+06	1.59573e+06	3.41688e+06	3.36852e+06	3.25442e+06	2.83625e+06	2.8986e+06	3.06398e+06	6.08588e+06	7.40827e+06	6.78815e+06	6.60401e+06	5.95388e+06	5.51276e+06
140	LPE 16:1		73.2	C21 H42 N O7 P	neg	13.1	450.262	M-H	LPE	1.11539e+07	1.73668e+07	1.32075e+07	1.26096e+07	1.23872e+07	1.04071e+07	2.58997e+06	2.57271e+06	2.64807e+06	2.31749e+06	1.98766e+06	1.93406e+06	1.00807e+07	1.31019e+07	1.17756e+07	1.27901e+07	1.04626e+07	1.04382e+07
141	LPG 19:1		71.5	C25 H49 O9 P	neg	16.488	523.303	M-H	LPG	4.73533e+06	5.6959e+06	5.66803e+06	5.9057e+06	5.03552e+06	5.76299e+06	799214	693950	776224	677543	699760	682719	197614	292855	258503	132243	298280	195798
142	LPG 18:3		73.8	C24 H43 O9 P	neg	13.062	505.256	M-H	LPG	2.62332e+08	2.96757e+08	2.91388e+08	2.56019e+08	2.34478e+08	2.27957e+08	1.44176e+08	1.3057e+08	1.42996e+08	1.37303e+08	1.26886e+08	1.24664e+08	4.83016e+08	6.07714e+08	5.75267e+08	6.08858e+08	4.91064e+08	4.94752e+08
143	LPG 18:2		74.3	C24 H45 O9 P	neg	13.696	507.272	M-H	LPG	3.78753e+07	4.4159e+07	4.32452e+07	3.88998e+07	3.13502e+07	3.22634e+07	2.00461e+07	1.6518e+07	1.79742e+07	1.8156e+07	1.9465e+07	1.87129e+07	7.54772e+07	8.80052e+07	7.41319e+07	7.7066e+07	6.91475e+07	7.44526e+07
144	LPG 18:1		73.1	C24 H47 O9 P	neg	15.252	509.287	M-H	LPG	9.06878e+08	8.88642e+08	5.9498e+08	8.1749e+08	8.9783e+08	7.58779e+08	4.47329e+08	4.65601e+08	4.68416e+08	4.38928e+08	4.39537e+08	4.67614e+08	1.205e+09	1.48565e+09	1.31771e+09	1.32236e+09	1.21448e+09	1.18442e+09
145	LPG 18:0		70.3	C24 H49 O9 P	neg	16.499	511.303	M-H	LPG	5.86928e+06	7.06811e+06	7.54263e+06	8.54807e+06	6.78877e+06	8.28663e+06	4.27177e+06	4.13411e+06	4.54648e+06	3.91993e+06	3.97479e+06	3.84158e+06	1.5348e+07	2.30552e+07	1.98742e+07	1.82027e+07	1.71397e+07	1.70104e+07
146	LPG 17:1		67.3	C23 H45 O9 P	neg	14.394	495.272	M-H	LPG	1.05075e+07	1.01478e+07	1.03924e+07	1.11541e+07	1.06695e+07	9.50708e+06	1.04346e+06	920596	927082	985782	957137	1.07024e+06	295398	385196	434783	406523	295918	281529
147	LPG 17:0		68.1	C23 H47 O9 P	neg	15.855	497.288	M-H	LPG	3.11732e+06	3.22819e+06	3.47418e+06	3.40736e+06	3.10163e+06	3.28503e+06	2.94818e+06	2.41707e+06	2.47082e+06	2.48625e+06	2.66526e+06	2.40965e+06	5.2526e+06	7.84336e+06	7.19712e+06	6.58275e+06	5.80473e+06	5.35391e+06
148	LPG 16:0		76.4	C22 H45 O9 P	neg	14.768	483.272	M-H	LPG	8.79115e+08	9.10743e+08	8.73289e+08	9.49826e+08	8.20574e+08	7.80274e+08	5.83674e+08	6.13377e+08	5.81261e+08	5.56153e+08	5.32651e+08	5.09513e+08	1.37336e+09	1.8713e+09	1.52148e+09	1.50606e+09	1.34129e+09	1.39577e+09
149	LPI 18:2		64.2	C27 H49 O12 P	neg	13.263	595.288	M-H	LPI	7.08231e+08	7.43465e+08	7.35102e+08	6.88147e+08	6.46877e+08	6.26974e+08	6.41844e+08	6.05059e+08	6.10572e+08	6.38961e+08	5.60985e+08	5.65652e+08	1.40298e+09	1.72792e+09	1.62202e+09	1.61685e+09	1.44416e+09	1.3579e+09
150	LPI 18:1		63.4	C27 H51 O12 P	neg	14.41	597.304	M-H	LPI	1.47393e+08	1.41469e+08	1.40873e+08	1.43994e+08	1.34797e+08	1.25797e+08	1.38995e+08	1.34888e+08	1.33233e+08	1.21735e+08	1.22818e+08	1.06832e+08	2.54014e+08	3.30759e+08	3.01237e+08	2.76425e+08	2.46683e+08	2.60664e+08
151	LPI 17:0		60.6	C26 H51 O12 P	neg	14.867	585.303	M-H	LPI	1.1239e+07	1.05168e+07	1.13504e+07	1.0958e+07	1.03996e+07	9.61639e+06	1.04708e+07	1.02688e+07	1.04492e+07	1.00266e+07	1.02828e+07	9.60535e+06	1.43598e+07	2.00251e+07	1.70123e+07	1.79947e+07	1.49074e+07	1.50583e+07
152	LPI 16:1		65.1	C25 H47 O12 P	neg	12.671	569.273	M-H	LPI	2.93915e+06	3.60432e+06	3.28756e+06	3.78813e+06	2.77346e+06	2.6202e+06	2.99733e+06	3.8967e+06	3.15543e+06	2.69734e+06	3.56958e+06	3.89002e+06	6.28484e+06	7.23701e+06	9.03758e+06	7.87666e+06	9.35016e+06	6.24864e+06
153	LPI 16:0		65	C25 H49 O12 P	neg	13.513	571.288	M-H	LPI	8.51449e+07	8.094e+07	9.35841e+07	7.73841e+07	8.25567e+07	6.85734e+07	1.04134e+08	8.66244e+07	9.27699e+07	9.09453e+07	8.82475e+07	9.16079e+07	1.73916e+08	2.13987e+08	1.90416e+08	2.1097e+08	1.6675e+08	1.75041e+08
154	LPS 20:1		68.6	C26 H50 N O9 P	neg	16.222	550.314	M-H	LPS	276091	351313	219754	357789	273817	357719	263157	280940	252408	281728	281635	215397	3.43644e+06	4.65928e+06	3.67067e+06	3.71571e+06	2.90897e+06	3.13955e+06
155	LPS 18:3		71.7	C24 H42 N O9 P	neg	12.57	518.252	M-H	LPS	1.3237e+07	1.20416e+07	1.26516e+07	1.22354e+07	1.16576e+07	1.11293e+07	7.12745e+06	7.02438e+06	7.15325e+06	7.68852e+06	6.52828e+06	7.25239e+06	9.45603e+07	1.16475e+08	1.02609e+08	1.0934e+08	9.41204e+07	9.51419e+07
156	LPS 18:2		68.1	C24 H44 N O9 P	neg	13.107	520.267	M-H	LPS	2.52326e+06	3.5641e+06	2.92645e+06	2.77595e+06	2.51449e+06	2.06325e+06	1.813e+06	1.89779e+06	1.8276e+06	1.88415e+06	1.96548e+06	1.83005e+06	1.05422e+07	1.66514e+07	1.54355e+07	1.41328e+07	1.24483e+07	1.2343e+07
157	LPS 18:1		70.9	C24 H46 N O9 P	neg	14.528	522.283	M-H	LPS	1.24345e+06	1.26762e+06	1.26271e+06	1.2008e+06	994096	1.00009e+06	3.54978e+06	3.63843e+06	3.51842e+06	3.27452e+06	3.34197e+06	3.39047e+06	6.89799e+06	8.78843e+06	8.1989e+06	7.4974e+06	7.37482e+06	5.50843e+06
158	LPS 16:0		77.3	C22 H44 N O9 P	neg	14.081	496.267	M-H	LPS	3.68125e+06	4.06089e+06	3.70883e+06	4.10645e+06	3.81802e+06	3.35298e+06	1.15718e+07	1.1063e+07	1.06713e+07	1.01419e+07	1.044e+07	9.55583e+06	1.8937e+07	2.38883e+07	2.38183e+07	2.14289e+07	1.93779e+07	1.80862e+07
159	Cer-AS d34:2		63.7	C34 H65 N O4	neg	21.924	596.495	M+COOH	Cer	849888	1.29454e+06	1.00377e+06	1.03763e+06	1.12056e+06	890754	3.88143e+06	3.50317e+06	4.42519e+06	3.86635e+06	3.62897e+06	4.19106e+06	697588	696532	691182	768821	642338	701344
160	MGDG 36:6		81.6	C45 H74 O10	neg	20.973	819.525	M+COOH	SL	6.03725e+07	5.72823e+07	5.44994e+07	5.57696e+07	5.16031e+07	5.56292e+07	4.6628e+07	4.81837e+07	4.34686e+07	3.8616e+07	4.06343e+07	4.27415e+07	8.29675e+07	9.15133e+07	7.18552e+07	6.74871e+07	5.6222e+07	5.94986e+07
161	MGDG 36:4		72	C45 H78 O10	neg	22.278	823.557	M+COOH	SL	4.50727e+06	4.55428e+06	4.18716e+06	3.70178e+06	3.81612e+06	3.8831e+06	2.47047e+06	2.58508e+06	2.74523e+06	3.29925e+06	2.44166e+06	3.07366e+06	6.4301e+06	4.95179e+06	4.38217e+06	4.2222e+06	4.41061e+06	4.58978e+06
162	MGDG 34:4		70.6	C43 H74 O10	neg	21.469	795.528	M+COOH	SL	1.21517e+06	1.24355e+06	1.02713e+06	1.08352e+06	1.10693e+06	1.0873e+06	744388	775616	712924	614371	594879	732038	1.88708e+06	2.098e+06	1.80187e+06	1.82498e+06	1.67849e+06	1.75544e+06
163	MGDG 34:3		75.1	C43 H76 O10	neg	22.316	797.542	M+COOH	SL	1.04784e+07	1.11843e+07	1.01568e+07	9.52979e+06	9.12489e+06	9.09689e+06	6.35081e+06	6.27177e+06	6.65629e+06	6.57111e+06	6.69847e+06	7.61337e+06	1.40855e+07	1.06964e+07	9.13065e+06	9.0975e+06	9.06164e+06	1.0197e+07
164	MGDG 20:3		68.6	C29 H48 O10	neg	14.788	555.316	M-H	SL	5.45779e+06	5.73495e+06	5.67731e+06	5.66314e+06	5.61137e+06	4.87381e+06	1.9387e+06	1.98224e+06	2.0452e+06	1.64676e+06	1.64473e+06	1.63959e+06	4.77414e+06	6.68713e+06	5.55607e+06	5.07927e+06	4.26835e+06	3.83732e+06
165	DGDG 36:6		65.1	C51 H84 O15	neg	20.229	981.578	M+COOH	SL	1.70369e+07	1.48126e+07	1.47725e+07	1.48944e+07	1.25186e+07	1.64863e+07	1.31993e+07	1.27751e+07	1.33043e+07	1.0507e+07	1.12353e+07	1.17009e+07	2.63663e+07	3.35496e+07	2.5512e+07	2.34754e+07	2.03332e+07	2.01102e+07
166	DGDG 36:3		63.6	C51 H90 O15	neg	22.45	987.624	M+COOH	SL	4.78198e+06	4.70725e+06	3.94896e+06	3.68007e+06	3.72122e+06	3.5619e+06	3.46718e+06	3.62206e+06	3.93052e+06	3.97606e+06	3.6189e+06	4.4997e+06	5.69128e+06	4.9575e+06	3.96588e+06	4.09604e+06	4.33264e+06	4.65829e+06
167	DGDG 34:3		64.7	C49 H86 O15	neg	21.57	959.592	M+COOH	SL	1.34797e+07	1.22321e+07	1.09368e+07	1.20165e+07	1.24471e+07	1.10957e+07	1.01727e+07	9.81222e+06	9.76902e+06	1.01172e+07	8.794e+06	1.06451e+07	1.59063e+07	1.45488e+07	1.29855e+07	1.31296e+07	1.11267e+07	1.24779e+07
168	DGDG 34:2		63.8	C49 H88 O15	neg	22.256	915.605	M-H	SL	4.2616e+06	3.87797e+06	3.52923e+06	3.27927e+06	3.3837e+06	3.46009e+06	2.30419e+06	2.33977e+06	2.64499e+06	2.40166e+06	2.33295e+06	2.58295e+06	5.38415e+06	4.29018e+06	3.81894e+06	3.6705e+06	4.22148e+06	3.73283e+06
169	DGDG 20:3		77.6	C35 H58 O15	neg	13.339	717.369	M-H	SL	2.52664e+06	2.7891e+06	2.49651e+06	2.46548e+06	2.39065e+06	2.05784e+06	1.28124e+06	1.2205e+06	1.14367e+06	1.352e+06	1.1396e+06	942458	2.41516e+06	3.11457e+06	2.55502e+06	2.50372e+06	2.03374e+06	2.09842e+06
170	9,10-Dihydroxy-12Z-octadecenoic acid	94.8		C18 H34 O4	neg	12.087	313.238	M-H	FA	5.65665e+07	6.56968e+07	5.9465e+07	5.91652e+07	5.52912e+07	5.20011e+07	6.41483e+07	6.39458e+07	6.41754e+07	6.47011e+07	6.0047e+07	5.88598e+07	1.49887e+07	1.80495e+07	1.6236e+07	1.68794e+07	1.4567e+07	1.57597e+07
171	13-HODE	93.4	67.7	C18 H32 O3	neg	13.681	295.227	M-H	FA	1.24725e+08	1.24195e+08	1.1901e+08	1.09521e+08	1.10155e+08	9.96457e+07	3.93235e+08	2.42853e+08	2.46325e+08	2.37492e+08	2.45042e+08	3.18922e+08	2.13122e+08	2.81885e+08	2.27191e+08	2.30249e+08	1.90967e+08	1.93551e+08
172	Oleic acid	94.3		C18 H34 O2	neg	18.555	281.248	M-H	FA	1.79251e+06	1.57082e+06	1.55282e+06	1.56003e+06	1.41331e+06	1.75887e+06	3.6058e+06	3.33938e+06	3.26308e+06	3.31779e+06	3.44451e+06	3.25447e+06	3.59041e+06	3.78797e+06	2.97178e+06	3.52974e+06	3.45584e+06	2.90599e+06
173	Methylsuccinic acid	98.1	87.2	C5 H8 O4	neg	0.738	131.033	M-H	FA	1.18935e+09	1.69844e+09	1.28214e+09	1.28074e+09	1.6818e+09	2.87466e+09	5.72661e+08	6.09501e+08	6.85769e+08	5.71892e+08	3.93675e+08	7.69332e+08	7.55924e+08	6.48537e+08	1.51769e+09	6.04009e+08	6.09662e+08	8.83796e+08
174	Linolenic acid	85.5		C18 H30 O2	neg	16.484	277.216	M-H	FA	1.49902e+07	1.5356e+07	1.4583e+07	1.44078e+07	1.36661e+07	1.27312e+07	2.26809e+07	2.08549e+07	2.12435e+07	2.07224e+07	2.28979e+07	2.37996e+07	4.53661e+07	5.40745e+07	4.79153e+07	4.68769e+07	4.41576e+07	4.23446e+07
175	Itaconic acid	90.7	84.6	C5 H6 O4	neg	1.113	129.018	M-H	FA	1.46742e+06	1.57144e+06	1.77339e+06	1.57554e+06	1.68681e+06	1.82678e+06	2.05066e+06	1.60625e+06	1.76557e+06	1.83491e+06	1.58186e+06	1.6554e+06	1.2927e+06	1.74697e+06	1.52659e+06	1.81676e+06	1.73892e+06	1.59044e+06
176	Hexadecanedioic acid	92.9		C16 H30 O4	neg	12.657	285.207	M-H	FA	3.64339e+06	4.37587e+06	3.67349e+06	3.88453e+06	4.53266e+06	3.74197e+06	6.90539e+06	6.37443e+06	6.75237e+06	6.65924e+06	6.35249e+06	6.54845e+06	4.10719e+06	4.23835e+06	3.91981e+06	3.90945e+06	3.50045e+06	3.47171e+06
177	FAHFA 20:1		73.3	C20 H36 O4	neg	14.317	339.253	M-H	FA	5.73575e+06	4.58398e+06	5.77954e+06	5.05423e+06	5.34731e+06	4.82886e+06	8.50164e+06	8.01446e+06	1.02639e+07	7.95135e+06	7.31257e+06	8.99474e+06	7.79982e+06	8.6124e+06	8.17098e+06	5.97978e+06	5.68066e+06	6.06326e+06
178	Dodecanedioic acid	88.4		C12 H22 O4	neg	9.263	229.143	M-H	FA	6.93645e+06	6.76954e+06	6.06098e+06	7.14073e+06	1.02384e+07	5.98398e+06	1.33094e+07	1.45321e+07	1.23918e+07	1.30246e+07	1.24013e+07	1.37968e+07	1.56627e+07	1.49718e+07	1.36991e+07	1.4107e+07	1.56218e+07	1.44085e+07
179	Azelaic acid	96.9	93.3	C9 H16 O4	neg	6.622	187.096	M-H	FA	5.71621e+07	6.03657e+07	5.61366e+07	5.53956e+07	5.72967e+07	5.40658e+07	3.70123e+07	3.42767e+07	3.24016e+07	3.48592e+07	3.6955e+07	3.20795e+07	9.70005e+07	5.74229e+07	4.92854e+07	4.07549e+07	9.86185e+07	1.0231e+08
180	9-HpODE	80.8		C18 H32 O4	neg	11.21	311.222	M-H	FA	6.63895e+07	4.71201e+07	4.5442e+07	4.8439e+07	4.00519e+07	4.35312e+07	7.65132e+07	7.89969e+07	8.18983e+07	6.53944e+07	7.34286e+07	6.85078e+07	6.76106e+07	5.84567e+07	5.39147e+07	6.8402e+07	4.86924e+07	5.51289e+07
181	3-Methyladipic acid		69.8	C7 H12 O4	neg	4.454	159.065	M-H	FA	625812	692498	785203	714507	733011	628641	759404	768959	1.13756e+06	857845	704438	753762	269523	464749	583077	507585	507159	245504
182	16-Hydroxyhexadecanoic acid	86.7		C16 H32 O3	neg	16.603	271.227	M-H	FA	2.66201e+07	2.82835e+07	2.7624e+07	2.71724e+07	2.64434e+07	2.48044e+07	7.27741e+07	6.7386e+07	6.51567e+07	6.67155e+07	6.70728e+07	6.38406e+07	3.26786e+07	3.96646e+07	3.87094e+07	3.66334e+07	3.30958e+07	3.13601e+07
183	Quinic acid	86.7	71.8	C7 H12 O6	neg	0.64	191.055	M-H	Organic acid	1.56978e+09	9.69551e+08	1.62246e+09	1.5165e+09	9.45225e+08	2.88818e+09	1.17635e+09	1.08138e+09	1.03839e+09	9.17789e+08	7.75009e+08	1.12085e+09	4.94877e+09	2.36808e+09	5.13869e+09	2.69403e+09	4.96266e+09	6.98022e+09
184	Malic acid	79.6	84.4	C4 H6 O5	neg	0.651	133.012	M-H	Organic acid	2.11891e+08	2.30698e+08	2.04126e+08	2.38859e+08	2.31462e+08	2.63391e+08	1.90637e+08	1.59979e+08	1.95303e+08	1.45002e+08	1.08177e+08	1.89511e+08	5.98114e+08	2.586e+08	5.82301e+08	4.74648e+08	5.96018e+08	5.42472e+08
185	Citric acid	62.2	65.1	C6 H8 O7	neg	0.62	191.019	M-H	Organic acid	5.01648e+07	1.2226e+08	8.11574e+08	2.9457e+08	6.75435e+08	8.31787e+08	7.16207e+06	6.0823e+06	2.19132e+08	8.1079e+06	3.93901e+06	2.12291e+07	1.03835e+09	4.05411e+08	7.30007e+08	7.9179e+08	1.02265e+09	8.80866e+08
186	2-Hydroxycinnamic acid	60.1	86.7	C9 H8 O3	neg	7.103	163.039	M-H	Organic acid	1.78686e+08	1.8767e+08	1.94732e+08	1.83601e+08	1.8455e+08	1.6893e+08	2.2329e+06	3.74954e+06	2.4367e+06	2.14311e+06	2.18433e+06	2.58284e+06	5.22885e+06	6.64791e+06	244488	471446	6.78767e+06	4.3483e+06
187	4-Acetoxyphenol		77.1	C8 H8 O3	neg	1.636	151.039	M-H	Organic acid	7.40648e+06	9.07616e+06	8.40459e+06	6.43383e+06	8.66803e+06	8.50874e+06	9.62584e+06	1.4055e+07	8.47331e+06	1.06278e+07	1.13827e+07	7.79677e+06	7.03329e+06	8.98165e+06	9.39058e+06	8.85092e+06	1.3792e+06	1.07037e+07
188	N-acetyltryptophan		90.1	C13 H14 N2 O3	neg	5.833	245.092	M-H	Amino acid	2.16832e+08	2.14753e+08	2.07606e+08	1.6927e+08	1.95519e+08	2.04078e+08	7.73784e+08	9.01894e+08	8.53456e+08	8.40564e+08	7.23841e+08	7.78591e+08	3.52261e+08	2.5041e+08	3.16463e+08	2.47135e+08	3.36618e+08	3.16173e+08
189	N-Acetylleucine		84.1	C8 H15 N O3	neg	4.889	172.096	M-H	Amino acid	1.8985e+07	2.0836e+07	2.13551e+07	2.82536e+07	2.01063e+07	2.08327e+07	3.78793e+07	2.56221e+07	2.79538e+07	2.80747e+07	2.63804e+07	3.41822e+07	4.61102e+07	5.44558e+07	5.50167e+07	5.26104e+07	5.25981e+07	4.30475e+07
190	N-Acetyl-glutamine	89.4		C7 H12 N2 O4	neg	7.181	187.075	M-H	Amino acid	5.61852e+06	6.24974e+06	6.69467e+06	6.13138e+06	6.18984e+06	5.82773e+06	1.06984e+06	914534	929362	1.00382e+06	839710	1.03624e+06	192608	137920	125268	111273	134209	201635
191	Aspartic acid		70.2	C4 H7 N O4	neg	0.623	132.029	M-H	Amino acid	1.38305e+07	1.67588e+07	3.2476e+07	5.88008e+07	1.47436e+07	1.44552e+07	3.98545e+07	1.86427e+07	5.84452e+07	1.21723e+08	2.41125e+07	1.38462e+08	7.00097e+07	5.4782e+07	7.98522e+07	3.14631e+07	3.02018e+07	3.03826e+07
192	4-Oxoproline	95.4		C5 H7 N O3	neg	0.667	128.034	M-H	Amino acid	1.20062e+08	1.34085e+08	1.23862e+08	1.61485e+08	1.41832e+08	1.50531e+08	2.21904e+08	1.88386e+08	2.08634e+08	1.74937e+08	1.47552e+08	1.51082e+08	2.56126e+08	1.09923e+08	2.6583e+08	2.2894e+08	2.64751e+08	2.52416e+08
193	Theophylline	83.1	80.7	C7 H8 N4 O2	neg	2.43	179.056	M-H	Alkaloid	1.25805e+07	1.36645e+07	1.4468e+07	1.51079e+07	1.41728e+07	1.39267e+07	1.02945e+06	5.01189e+06	3.59548e+06	5.12286e+06	5.48758e+06	4.30616e+06	3.27023e+06	3.23529e+06	3.52574e+06	3.20473e+06	3.01047e+06	3.29582e+06
194	Epigallocatechin gallate	92	84.7	C22 H18 O11	neg	0.8	457.077	M-H	Catechin	1.82314e+09	1.55535e+09	2.29795e+09	3.76342e+09	9.78074e+08	2.17505e+09	1.73728e+08	7.778e+07	3.56812e+08	1.06489e+08	6.75361e+07	2.22696e+08	4.01265e+09	4.1888e+09	2.37573e+09	9.56537e+09	9.21482e+09	6.10435e+09
195	Epicatechin-3-O-gallate		83.6	C22 H18 O10	neg	5.667	441.082	M-H	Catechin	2.94324e+10	3.56784e+10	3.46265e+10	3.18633e+10	3.1092e+10	3.25325e+10	4.50936e+09	4.53914e+09	4.68557e+09	4.31486e+09	3.9174e+09	4.20883e+09	7.118e+10	6.17304e+10	5.80174e+10	5.19899e+10	5.37848e+10	7.11634e+10
196	Tiliroside		93.1	C30 H26 O13	neg	7.422	593.129	M-H	Flavonoid	1.54025e+08	1.38579e+08	1.57141e+08	1.44527e+08	1.39486e+08	1.3184e+08	9.9957e+07	1.17837e+08	1.12866e+08	1.14802e+08	1.097e+08	1.08628e+08	3.69368e+08	3.4131e+08	2.89596e+08	2.58683e+08	3.56099e+08	3.90635e+08
197	Taxifolin		61.3	C15 H12 O7	neg	5.803	303.051	M-H	Flavonoid	6.4422e+07	6.09125e+07	5.82118e+07	4.68217e+07	4.94214e+07	6.20163e+07	1.04591e+08	1.23607e+08	1.0654e+08	9.9651e+07	9.95264e+07	1.03686e+08	2.77168e+07	1.13301e+07	1.83975e+07	2.31034e+07	2.86655e+07	3.05577e+07
198	Quercetin-3β-D-glucoside	87.5	78.2	C21 H20 O12	neg	0.738	463.087	M-H	Flavonoid	1.6158e+07	2.06267e+07	1.55807e+07	1.98026e+07	1.85475e+07	1.75153e+07	2.15073e+07	3.10696e+07	2.25321e+07	3.23245e+07	3.49514e+07	2.91197e+07	3.28909e+07	2.96959e+07	4.63157e+07	3.98011e+07	3.4054e+07	3.2933e+07
199	Quercetin-3-O-beta-glucopyranosyl-6'-acetate		74	C23 H22 O13	neg	6.37	505.098	M-H	Flavonoid	1.57883e+07	1.47825e+07	1.508e+07	1.39617e+07	1.28556e+07	1.33608e+07	3.47214e+06	3.47471e+06	3.54021e+06	4.12703e+06	3.23243e+06	3.50881e+06	1.78616e+07	6.15196e+06	6.41499e+06	5.1657e+06	1.74443e+07	1.81314e+07
200	Phloretin	63.1		C15 H14 O5	neg	6.301	273.077	M-H	Flavonoid	9.14267e+06	9.67722e+06	9.52654e+06	9.81302e+06	8.961e+06	8.0136e+06	1.25179e+06	1.42976e+06	1.24147e+06	1.92954e+06	868755	1.09674e+06	3.50223e+07	1.24151e+07	1.08507e+07	1.24644e+07	4.02232e+07	4.01998e+07
201	Luteolin	88.6		C15 H10 O6	neg	4.965	285.04	M-H	Flavonoid	302068	281908	180399	595927	398446	383939	111527	188478	137556	87990.8	115714	133577	1.28367e+06	1.03071e+06	1.44254e+06	2.36069e+06	1.66775e+06	802213
202	Isorhamnetin	69	60.7	C16 H12 O7	neg	8.404	315.051	M-H	Flavonoid	8.15478e+06	8.42424e+06	8.57977e+06	9.44878e+06	9.11533e+06	8.37554e+06	6.80636e+06	4.87755e+06	6.4747e+06	4.88658e+06	4.98239e+06	4.52741e+06	7.83255e+06	7.50702e+06	7.06557e+06	6.51554e+06	7.39331e+06	7.75931e+06
203	Cynaroside	61.6	78	C21 H20 O11	neg	6.625	447.093	M-H	Flavonoid	1.02659e+07	2.64389e+07	2.27187e+07	2.39235e+07	2.35825e+07	2.01967e+07	2.45492e+07	2.68679e+07	2.62621e+07	2.8867e+07	2.23577e+07	1.61558e+07	4.06338e+07	2.25341e+07	1.91495e+07	1.55356e+07	4.47138e+07	4.0527e+07
204	Apigetrin	60.5	72.8	C21 H20 O10	neg	7.566	431.098	M-H	Flavonoid	1.18068e+07	1.2036e+07	1.22946e+07	1.3779e+07	1.0445e+07	1.19129e+07	2.74592e+07	2.68439e+07	2.87716e+07	2.59936e+07	2.35903e+07	2.62178e+07	1.32191e+07	1.28323e+07	1.15358e+07	9.46589e+06	1.3144e+07	1.31606e+07
205	Afzelechin		72.9	C15 H14 O5	neg	5.374	273.076	M-H	Flavonoid	368919	833117	278232	1.80479e+07	308697	661067	3.74895e+07	3.72959e+07	4.15152e+07	1.27346e+06	926456	3.85621e+07	597639	708112	5.45863e+07	5.16089e+07	4.63119e+07	599852
206	Nicotiflorin	88.4	93.7	C27 H30 O15	neg	6.073	593.151	M-H	Flavonoid	1.14028e+09	1.09206e+09	1.07766e+09	1.01982e+09	9.70052e+08	9.67781e+08	4.62993e+08	4.9567e+08	4.75587e+08	4.77069e+08	4.17949e+08	4.31868e+08	2.7428e+09	1.84052e+09	2.06348e+08	1.53008e+09	2.42146e+09	2.44398e+09
207	(-)-Dihydrokaempferol		73.3	C15 H12 O6	neg	6.508	287.056	M-H	Flavonoid	2.69598e+07	2.65535e+07	2.58275e+07	2.5762e+07	2.55025e+07	2.41054e+07	3.6203e+07	3.80119e+07	3.81497e+07	3.88916e+07	3.57233e+07	3.31228e+07	4.13934e+07	1.54343e+07	1.82333e+07	1.0931e+07	4.14145e+07	3.89174e+07
208	Nevskin	77.7		C24 H32 O5	neg	13.125	445.222	M+COOH	Terpenoid	103793	132509	125361	157663	151194	116729	2.80058e+06	2.76611e+06	2.85275e+06	2.45569e+06	2.43828e+06	2.58373e+06	395703	1.89771e+06	2.51635e+06	220269	225172	728743
209	Abscisic acid	83.8	71.6	C15 H20 O4	neg	7.433	263.128	M-H	Terpenoid	2.08768e+07	2.10238e+07	2.07831e+07	1.98083e+07	1.8179e+07	1.89882e+07	2.3536e+07	2.67974e+07	2.28273e+07	2.34333e+07	2.26463e+07	2.58858e+07	4.35407e+07	3.57031e+07	3.65808e+07	2.93937e+07	4.18939e+07	4.31399e+07
210	Rosiridin	63.8		C16 H28 O7	neg	6.312	377.179	M-H	Terpenoid	7.94315e+06	4.95646e+06	3.61303e+06	3.08505e+06	3.41934e+06	4.76039e+06	1.64359e+06	1.6431e+06	1.18875e+06	1.39223e+06	1.39734e+06	1.22721e+06	1.43932e+07	2.77701e+06	2.94338e+06	5.0075e+06	1.30887e+07	2.15161e+07
211	Scopoletin		86.2	C10 H8 O4	neg	6.927	191.034	M-H	Coumarin	1.3869e+08	1.37682e+08	1.36289e+08	1.36556e+08	1.26972e+08	1.32359e+08	5.57582e+07	5.45088e+07	5.4556e+07	5.69873e+07	5.59926e+07	5.44428e+07	2.29792e+06	1.23513e+06	1.03127e+06	999143	2.29403e+06	2.03452e+06
212	(3beta,9xi)-3-(beta-D-Glucopyranosyloxy)-14-hydroxycard-20(22)-enolide	62.7		C29 H44 O9	neg	14.901	581.299	M+COOH	Steroid	4.75698e+08	5.00509e+08	4.89205e+08	5.01536e+08	4.85993e+08	4.42434e+08	5.64468e+08	5.45579e+08	5.94174e+08	5.0237e+08	5.44609e+08	5.31605e+08	8.82943e+08	1.0232e+09	9.86589e+08	1.00121e+09	7.99929e+08	8.2738e+08
213	1,6-Digalloyl-Beta-D-Glucopyranose		86.9	C20 H20 O14	neg	0.734	483.077	M-H	Sugar	2.35315e+07	2.07188e+07	4.0851e+07	2.48357e+07	2.19746e+07	2.46038e+07	6.58767e+06	4.65261e+06	4.29728e+06	4.15715e+06	4.16257e+06	5.47273e+06	1.02092e+08	1.0754e+08	9.58598e+07	1.02695e+08	9.462e+07	9.78173e+07
214	α,α-Trehalose	65.4	88.8	C12 H22 O11	neg	0.627	341.108	M-H	Sugar	1.04667e+08	1.36349e+08	1.56054e+08	1.13884e+08	1.061e+08	1.04178e+08	2.31869e+07	2.00652e+07	2.09238e+07	1.62873e+07	1.18362e+07	1.98687e+07	4.30364e+08	2.79202e+08	3.52684e+08	2.08665e+08	3.04276e+08	2.79938e+08
215	1,3,6-Tri-O-galloylglucose		69.7	C27 H24 O18	neg	0.799	635.088	M-H	Sugar	3.69863e+07	3.85546e+07	3.50305e+07	3.06938e+07	3.91603e+07	3.91977e+07	5.86594e+06	7.2049e+06	6.4608e+06	5.60402e+06	6.22182e+06	8.06698e+06	1.65729e+08	1.53331e+08	2.25651e+08	2.89607e+08	2.14527e+08	1.53821e+08
216	1,3,7-Trimethyluric acid	93.3	76.3	C8 H10 N4 O3	neg	2.999	209.067	M-H	Nucleoside	2.29251e+06	2.22499e+06	2.42668e+06	8.32405e+06	2.25119e+06	2.42752e+06	1.32822e+07	3.46495e+06	1.56315e+06	3.4418e+06	2.82282e+06	710798	1.86572e+06	439875	9.36556e+06	8.32758e+06	1.02152e+07	2.62981e+06
217	Salicylic acid	95.3	83	C7 H6 O3	neg	6.472	137.023	M-H	Phenol	3.47812e+07	3.67439e+07	3.24022e+07	3.45276e+07	3.37961e+07	3.70537e+07	4.97184e+06	4.76733e+06	4.2555e+06	4.459e+06	256163	876403	2.65385e+08	1.2122e+08	1.34565e+08	1.05395e+08	2.68971e+08	2.85075e+08
218	Gentisic acid	91.5	70.1	C7 H6 O4	neg	0.691	153.018	M-H	Phenol	2.03148e+08	1.93415e+08	1.76996e+08	1.06818e+07	2.12977e+08	2.00002e+08	2.02419e+07	1.85946e+08	1.61566e+07	1.93643e+08	1.62614e+08	1.2699e+07	6.89004e+07	5.73738e+06	8.8539e+06	7.44789e+06	3.9853e+06	5.99147e+07
219	Gallic acid	93.3	91.8	C7 H6 O5	neg	5.892	169.013	M-H	Phenol	4.0444e+07	4.5769e+07	3.96735e+07	4.1937e+07	4.81679e+07	3.82647e+07	2.2973e+07	1.81233e+07	1.53689e+07	1.21152e+07	1.28148e+07	2.34241e+07	4.72851e+07	1.87557e+07	3.86688e+07	6.21037e+07	3.27174e+07	9.94696e+07
220	Chlorogenic acid	62.5	89.1	C16 H18 O9	neg	0.655	353.087	M-H	Phenol	8.23075e+07	7.94284e+07	5.91774e+07	8.62645e+07	7.51365e+07	6.98564e+07	6.65298e+06	4.6802e+06	5.45625e+06	4.74528e+06	3.88609e+06	5.14298e+06	1.81171e+08	1.59498e+08	1.43232e+08	1.79894e+08	1.22702e+08	1.27595e+08
221	Protocatechuic acid	94.1		C7 H6 O4	neg	1.324	153.018	M-H	Phenol	6.29742e+06	5.52929e+06	6.02397e+06	6.85932e+06	5.37952e+06	5.69533e+06	7.20172e+06	4.66779e+06	8.74635e+06	4.32725e+06	4.4615e+06	7.07537e+06	3.58604e+06	4.03931e+06	5.32719e+06	4.84724e+06	3.09272e+06	4.1373e+06
222	Catechol	84.8		C6 H6 O2	neg	1.103	109.028	M-H	Phenol	1.19824e+06	4.97592e+06	6.04641e+06	5.29246e+06	1.49778e+06	5.85209e+06	4.29816e+06	6.94231e+06	1.66086e+07	1.51049e+06	8.01342e+06	1.55105e+07	3.48084e+06	3.94047e+06	3.8146e+06	3.46641e+06	5.55591e+06	3.31302e+06
223	4-Methylphenol	94.2		C7 H8 O	neg	4.869	107.049	M-H	Phenol	8.39119e+06	7.96961e+06	8.75856e+06	6.90795e+06	5.07059e+06	7.13467e+06	1.3237e+07	1.05379e+07	1.38397e+07	1.0929e+07	1.10568e+07	1.35674e+07	3.58057e+06	4.00339e+06	4.20404e+06	3.54896e+06	3.28012e+06	3.95773e+06
224	2',6'-Dihydroxy-4'-methoxyacetophenone		68.9	C9 H10 O4	neg	7.678	181.049	M-H	Ketone	644106	481976	668871	461009	395208	422185	9.26162e+06	7.65399e+06	8.26291e+06	8.95019e+06	8.3125e+06	8.57102e+06	190897	122599	107275	196905	161078	165767
