# Supplementary material for: Characterisation of the phytochemical and bioactivity profiles of raw tea, stale-aroma, and betelnut-aroma type of Liupao tea through GC/LC-MS-based metabolomics
Source: Royal Society of Chemistry journal article supplement (doi:10.1039/d4ay01672f), 2024-12-09
Supplement: d4ay01672f3.xlsx [file d4ay01672f3.xlsx]

## Sheet: Sheet1
Metabolites identification for LC-MS-based lipidomics
No.	Compounds	mzcloud score	mzvault score	Formula	ESI	RT (min)	m/z	Adduct	Classification	Area: BA-1.raw	Area: BA-2.raw	Area: BA-3.raw	Area: BA-4.raw	Area: BA-5.raw	Area: BA-6.raw	Area: SA-1.raw	Area: SA-2.raw	Area: SA-3.raw	Area: SA-4.raw	Area: SA-5.raw	Area: SA-6.raw	Area: SF-1.raw	Area: SF-2.raw	Area: SF-3.raw	Area: SF-4.raw	Area: SF-5.raw	Area: SF-6.raw
1	TAG 54:5		62.6	C57 H100 O6	pos	20.272	898.788	M+NH4	TAG	1.07596e+07	1.25289e+07	1.11985e+07	1.16803e+07	1.04602e+07	9.84201e+06	5.94134e+07	5.01426e+07	5.48355e+07	6.78814e+07	4.94914e+07	4.83226e+07	1.52219e+07	1.28297e+07	1.37112e+07	7.74043e+06	1.27159e+07	9.16097e+06
2	TAG 52:2		62.1	C55 H102 O6	pos	15.177	876.802	M+NH4	TAG	131856	1.44643e+06	163567	5.9529e+06	189930	1.63596e+06	108930	6.53682e+06	5.55506e+06	5.92743e+06	5.15573e+06	6.98151e+06	168398	1.88549e+06	1.25766e+06	2.1834e+06	655260	1.6276e+06
3	TAG 50:3		64.9	C53 H96 O6	pos	19.964	851.709	M+Na	TAG	2.64349e+06	2.94792e+06	2.38064e+06	3.19529e+06	2.69765e+06	2.73176e+06	1.17611e+07	1.31454e+07	1.2306e+07	1.26771e+07	1.14592e+07	1.31118e+07	6.61648e+06	7.59151e+06	6.82015e+06	3.95583e+06	6.70979e+06	4.15294e+06
4	LDGTS 18:2		72.1	C28 H51 N O6	pos	3.963	498.379	M+H	LDGTS	1.162e+07	1.16365e+07	1.11314e+07	1.03943e+07	9.47186e+06	1.12279e+07	4.17253e+06	3.67933e+06	3.84924e+06	4.82258e+06	3.86569e+06	3.91e+06	1.16631e+07	1.18823e+07	1.28515e+07	4.68427e+06	1.12307e+07	6.38716e+06
5	LDGTS 16:0		61.5	C26 H51 N O6	pos	4.802	474.379	M+H	LDGTS	6.16592e+06	7.19001e+06	6.77652e+06	6.56464e+06	6.35078e+06	5.79251e+06	2.67567e+06	2.58459e+06	2.35053e+06	2.82334e+06	2.30023e+06	2.41936e+06	7.29074e+06	7.14978e+06	7.84575e+06	2.89195e+06	6.63995e+06	3.29611e+06
6	DGTS 34:2		66.7	C44 H81 N O7	pos	12.476	736.608	M+H	DGTS	4.08458e+07	4.08664e+07	4.20906e+07	4.31395e+07	4.29567e+07	4.10138e+07	1.22791e+07	9.0027e+06	1.08654e+07	1.0825e+07	1.12777e+07	1.18869e+07	3.57372e+07	3.24937e+07	3.44601e+07	1.95991e+07	3.60744e+07	2.18303e+07
7	PC 38:5		60.2	C46 H82 N O8 P	pos	11.779	808.585	M+H	PC	1.14324e+07	7.9333e+06	1.06336e+07	1.05833e+07	1.00772e+07	1.00142e+07	1.59295e+06	1.67659e+06	1.80544e+06	1.89107e+06	1.90588e+06	1.8047e+06	1.2258e+07	1.27582e+07	1.26555e+07	6.78819e+06	1.15972e+07	7.56158e+06
8	PC 38:4		73.5	C46 H84 N O8 P	pos	12.441	810.601	M+H	PC	8.01318e+06	1.47466e+07	9.40155e+06	9.44078e+06	8.209e+06	7.87971e+06	4.45927e+06	2.59671e+06	4.08888e+06	2.84351e+06	2.96986e+06	2.97874e+06	1.67125e+07	1.80011e+07	1.76273e+07	8.2298e+06	1.9951e+07	5.84803e+06
9	PC 36:6		73.1	C44 H76 N O8 P	pos	10.294	778.538	M+H	PC	1.20329e+08	1.18843e+08	1.21223e+08	1.06555e+08	1.16958e+08	1.1746e+08	3.63507e+07	4.09913e+07	3.71735e+07	4.05205e+07	3.72271e+07	3.80669e+07	1.45745e+08	1.60616e+08	1.61111e+08	1.28461e+08	1.70664e+08	1.24472e+08
10	PC 36:5		60.9	C44 H78 N O8 P	pos	10.945	780.553	M+H	PC	4.03278e+08	4.11282e+08	3.9745e+08	4.52415e+08	4.24157e+08	4.13026e+08	1.04059e+08	1.03499e+08	1.04244e+08	1.02684e+08	1.14064e+08	1.07313e+08	4.57999e+08	4.46368e+08	3.96454e+08	3.68215e+08	4.45182e+08	3.66679e+08
11	PC 36:4		73.7	C44 H80 N O8 P	pos	11.556	782.569	M+H	PC	5.059e+08	5.05181e+08	4.54602e+08	5.22039e+08	4.3786e+08	4.74661e+08	1.8796e+08	1.70289e+08	1.85076e+08	1.86628e+08	1.9079e+08	1.81111e+08	4.46827e+08	3.8342e+08	5.1189e+08	3.99192e+08	5.86845e+08	4.52755e+08
12	PC 36:3		60	C44 H82 N O8 P	pos	12.165	784.584	M+H	PC	2.46639e+08	2.71268e+08	2.97941e+08	2.93695e+08	2.88776e+08	2.79253e+08	5.34728e+07	6.70975e+07	6.66273e+07	7.01352e+07	6.99068e+07	7.66044e+07	2.64908e+08	2.51426e+08	2.91067e+08	1.90021e+08	2.8426e+08	2.2396e+08
13	PC 36:2		73.9	C44 H84 N O8 P	pos	12.838	786.601	M+H	PC	1.67463e+08	1.46716e+08	1.5351e+08	1.75292e+08	1.31584e+08	1.53709e+08	3.9156e+07	3.35334e+07	5.13432e+07	2.08909e+07	2.9496e+07	5.36962e+07	2.11036e+08	1.88066e+08	1.83005e+08	1.05775e+08	2.01772e+08	1.29143e+08
14	PC 36:1		60.6	C44 H86 N O8 P	pos	13.359	788.616	M+H	PC	4.48599e+07	3.82978e+07	3.95963e+07	4.17641e+07	3.96049e+07	4.10151e+07	6.49252e+06	6.91155e+06	5.81362e+06	4.87705e+06	6.34945e+06	6.67164e+06	4.83011e+07	4.53784e+07	4.41153e+07	1.99405e+07	4.70916e+07	2.02858e+07
15	PC 34:4		73.4	C42 H76 N O8 P	pos	10.694	754.538	M+H	PC	1.03145e+07	1.04265e+07	9.46579e+06	9.62349e+06	8.61695e+06	9.58913e+06	1.99502e+06	1.58669e+06	2.36872e+06	2.03744e+06	1.90613e+06	1.87518e+06	1.43729e+07	1.41956e+07	1.14581e+07	4.41603e+06	1.1885e+07	8.0343e+06
16	PC 34:3		61.1	C42 H78 N O8 P	pos	11.483	756.553	M+H	PC	3.16109e+08	2.88462e+08	3.08326e+08	2.83252e+08	2.65316e+08	2.87875e+08	1.56447e+08	1.45737e+08	1.6084e+08	1.82736e+08	1.67731e+08	1.65391e+08	3.01173e+08	3.38513e+08	3.2313e+08	3.25143e+08	3.45188e+08	3.28892e+08
17	PC 34:2		65.9	C42 H80 N O8 P	pos	12.046	758.569	M+H	PC	4.7314e+08	4.04735e+08	7.71817e+08	5.3123e+08	5.71406e+08	5.28833e+08	2.57237e+08	2.32537e+08	2.19426e+08	2.54868e+08	2.57437e+08	2.54143e+08	2.29726e+08	4.58207e+08	5.51917e+08	5.05208e+08	6.5198e+08	5.67122e+08
18	PC 34:1		60.9	C42 H82 N O8 P	pos	12.624	760.585	M+H	PC	3.15061e+08	3.98186e+08	3.24105e+08	3.28386e+08	3.45671e+08	3.43033e+08	7.23022e+07	6.35506e+07	6.21774e+07	6.01906e+07	6.2836e+07	7.40197e+07	2.83814e+08	2.98342e+08	3.07113e+08	1.92613e+08	2.96171e+08	2.15163e+08
19	PC 32:3		61.5	C40 H74 N O8 P	pos	10.522	728.522	M+H	PC	3.60796e+06	3.77892e+06	3.49013e+06	3.50423e+06	3.91982e+06	3.65493e+06	565211	557658	537937	490523	552842	607497	6.10349e+06	5.68663e+06	6.28061e+06	2.60276e+06	5.91253e+06	3.01742e+06
20	PC 32:2		74.3	C40 H76 N O8 P	pos	11.166	730.537	M+H	PC	4.52115e+06	4.76969e+06	4.26597e+06	4.29947e+06	4.45714e+06	4.63149e+06	920505	889453	690736	859938	789120	653870	6.78107e+06	6.67578e+06	6.58953e+06	3.61956e+06	6.96722e+06	4.2094e+06
21	PC 32:1		61.4	C40 H78 N O8 P	pos	11.829	732.553	M+H	PC	1.09466e+07	1.0551e+07	1.04346e+07	1.14167e+07	8.6188e+06	9.56656e+06	1.40192e+06	2.10408e+06	2.41882e+06	2.44598e+06	2.35172e+06	2.42362e+06	1.69013e+07	1.84364e+07	1.82472e+07	7.26831e+06	1.8908e+07	5.82755e+06
22	PC 18:2e		87.1	C26 H50 N O7 P	pos	3.074	520.34	M+H	PC	2.55043e+07	2.37324e+07	2.20487e+07	2.1204e+07	2.1947e+07	2.15264e+07	7.66983e+06	8.89685e+06	9.66694e+06	9.70882e+06	1.15745e+07	1.0984e+07	3.71821e+07	3.74804e+07	3.86489e+07	2.07897e+07	3.49884e+07	1.9046e+07
23	PC 18:1e		82.1	C26 H52 N O7 P	pos	4.159	522.353	M+H	PC	1.60493e+07	1.51967e+07	1.45906e+07	1.65858e+07	1.32353e+07	1.35978e+07	4.29454e+06	4.23821e+06	4.15973e+06	5.14568e+06	4.33821e+06	4.3108e+06	1.73288e+07	1.66887e+07	2.03706e+07	6.81382e+06	1.58234e+07	9.30312e+06
24	PC 18:0e		79.7	C26 H54 N O7 P	pos	5.552	524.371	M+H	PC	2.66322e+06	2.91878e+06	2.85168e+06	2.92025e+06	2.82309e+06	2.87768e+06	1.12859e+06	1.20238e+06	1.06249e+06	1.12541e+06	922707	1.00997e+06	3.2572e+06	2.91239e+06	3.64345e+06	1.42408e+06	2.82537e+06	1.43047e+06
25	PC 16:0e		86.1	C24 H50 N O7 P	pos	3.748	496.339	M+H	PC	1.67914e+07	1.61955e+07	1.51323e+07	1.48191e+07	1.37899e+07	1.3857e+07	5.52041e+06	5.68198e+06	5.6104e+06	6.01712e+06	5.85425e+06	6.75576e+06	2.53639e+07	2.33563e+07	2.85027e+07	9.87998e+06	2.56619e+07	1.25514e+07
26	PE 36:6		68.3	C41 H70 N O8 P	pos	10.543	736.492	M+H	PE	2.93332e+06	2.5828e+06	2.51394e+06	2.41465e+06	2.73337e+06	2.48905e+06	526958	542287	514029	499472	482199	506477	6.31775e+06	6.42521e+06	6.43674e+06	2.7209e+06	4.96552e+06	2.7774e+06
27	PE 36:5		68.9	C41 H72 N O8 P	pos	11.2	738.508	M+H	PE	9.53392e+06	1.0477e+07	8.4142e+06	9.14079e+06	9.8292e+06	9.30776e+06	2.61858e+06	2.73984e+06	2.57715e+06	2.568e+06	2.55128e+06	2.46255e+06	1.89688e+07	2.01271e+07	1.82605e+07	1.11286e+07	2.11606e+07	1.19415e+07
28	PE 36:4		97.2	C41 H74 N O8 P	pos	11.789	740.523	M+H	PE	1.86161e+07	1.83308e+07	1.63642e+07	1.78039e+07	1.83282e+07	1.60958e+07	4.89948e+06	5.99957e+06	6.35602e+06	7.02061e+06	6.71702e+06	6.16755e+06	2.97028e+07	3.2901e+07	3.04003e+07	2.04713e+07	2.25245e+07	2.10599e+07
29	PE 36:3		72.9	C41 H76 N O8 P	pos	12.394	742.536	M+H	PE	3.80751e+06	3.17661e+06	3.79518e+06	3.8229e+06	3.74775e+06	3.41122e+06	784492	830891	958410	839053	884552	837363	5.28972e+06	5.70366e+06	6.13902e+06	3.53472e+06	6.67952e+06	3.66466e+06
30	PE 34:2		70	C39 H74 N O8 P	pos	12.272	716.523	M+H	PE	2.87263e+07	2.51492e+07	2.33348e+07	2.58212e+07	2.23988e+07	2.3486e+07	6.72683e+06	6.42179e+06	6.68842e+06	6.64211e+06	7.46281e+06	7.25416e+06	3.0838e+07	2.86908e+07	3.5727e+07	2.38817e+07	3.33148e+07	2.43282e+07
31	Cer-NS d36:3		63	C36 H67 N O3	pos	12.901	562.519	M+H	Cer	1.01179e+06	1.13128e+06	1.06185e+06	1.20247e+06	1.03359e+06	1.16728e+06	3.43363e+06	3.15835e+06	3.28146e+06	2.83829e+06	2.68045e+06	2.80916e+06	686243	603617	615020	296612	738355	310775
32	SQDG 34:3		69	C43 H76 O12 S	pos	10.533	834.538	M+NH4	SL	2.38997e+07	2.24844e+07	2.17922e+07	2.1972e+07	2.36555e+07	2.24577e+07	8.78105e+06	9.14773e+06	8.48488e+06	8.33432e+06	8.29243e+06	8.80041e+06	2.41064e+07	2.1968e+07	2.26893e+07	1.29251e+07	2.12083e+07	1.35687e+07
33	SQDG 34:1		69.2	C43 H80 O12 S	pos	11.697	838.572	M+NH4	SL	5.52496e+06	5.50218e+06	5.35416e+06	5.09268e+06	4.89267e+06	5.38922e+06	2.00212e+06	2.02415e+06	1.96314e+06	2.14049e+06	2.18008e+06	1.89204e+06	4.34655e+06	5.33478e+06	4.7831e+06	2.77355e+06	5.07863e+06	3.13655e+06
34	SQDG 32:0		63.3	C41 H78 O12 S	pos	11.551	812.553	M+NH4	SL	3.61199e+06	3.94588e+06	3.56573e+06	3.70913e+06	3.58051e+06	3.53071e+06	1.68714e+06	1.48207e+06	1.69141e+06	1.52487e+06	1.76126e+06	1.64511e+06	3.34033e+06	3.51241e+06	3.70804e+06	2.30406e+06	3.43421e+06	2.61114e+06
35	Palmitoleic acid	60.1		C16 H30 O2	pos	2.383	277.216	M+Na	FA	5.45067e+07	5.52251e+07	5.31646e+07	4.77179e+07	5.12753e+07	5.25796e+07	6.15644e+07	6.49451e+07	7.40859e+07	8.5744e+07	7.87747e+07	7.60779e+07	9.03566e+07	1.09643e+08	1.13135e+08	6.05579e+07	9.0945e+07	5.57051e+07
36	Palmitic acid	81.9		C16 H32 O2	pos	1.637	274.274	NH4	FA	3.99848e+07	4.85158e+07	6.45919e+07	4.15564e+07	3.6945e+07	7.29147e+07	3.98418e+07	6.14263e+07	7.37828e+07	6.72826e+07	4.43073e+07	5.8652e+07	3.41056e+07	5.0769e+07	4.35085e+07	3.30098e+07	3.21744e+07	3.89639e+07
37	Oleamide	93.7		C18 H35 N O	pos	6.599	282.279	M+H	FA	5.91585e+06	6.33077e+06	5.76494e+06	5.0472e+06	5.19102e+06	3.66251e+06	8.42741e+06	8.59522e+06	5.83649e+06	1.00834e+07	7.31868e+06	8.71079e+06	5.9151e+06	6.29831e+06	6.62037e+06	3.57295e+06	6.14597e+06	3.1254e+06
38	octadec-9-ynoic acid	75.6		C18 H32 O2	pos	3.679	298.274	M+NH4	FA	4.15696e+06	4.81429e+06	3.16555e+06	2.58393e+06	2.54584e+06	2.45255e+06	1.32494e+07	1.41828e+07	1.25851e+07	1.52276e+07	1.3831e+07	1.43546e+07	4.53631e+06	3.56087e+06	4.18645e+06	1.95019e+06	3.79086e+06	1.89951e+06
39	Hexadecanamide	97.6		C16 H33 N O	pos	1.634	256.263	M+H	FA	8.99626e+06	9.00704e+06	8.07529e+06	7.79329e+06	8.88859e+06	8.25972e+06	9.32633e+06	9.60766e+06	9.8563e+06	1.04155e+07	8.56194e+06	8.99157e+06	7.87962e+06	7.88873e+06	9.04756e+06	4.68791e+06	7.36634e+06	5.85806e+06
40	9-Oxo-10,12-octadecadienoic acid	92.1		C18 H30 O3	pos	3.411	295.226	M+H	FA	2.42116e+07	1.80711e+07	1.76191e+07	2.00151e+07	1.85151e+07	1.75772e+07	2.0539e+07	2.22064e+07	1.866e+07	2.03995e+07	2.16088e+07	2.68291e+07	2.06325e+07	1.88446e+07	2.09294e+07	1.6114e+07	2.34209e+07	1.45854e+07
41	12-Oxo phytodienoic acid	83.7		C18 H28 O3	pos	2.564	293.212	M+H	FA	1.55891e+07	1.41006e+07	1.71889e+07	1.61972e+07	1.49942e+07	1.36426e+07	1.58653e+07	1.62846e+07	1.56096e+07	2.11724e+07	1.95578e+07	2.30192e+07	1.36258e+07	1.30336e+07	1.51249e+07	8.74015e+06	1.38181e+07	8.78395e+06
42	Avocadene 2-acetate	62.1		C19 H36 O4	pos	1.314	351.253	M+Na	FA	7.87654e+06	9.32494e+06	7.27321e+06	8.85333e+06	7.68757e+06	7.61666e+06	2.03132e+06	2.98448e+06	2.29374e+06	2.2159e+06	2.89442e+06	2.09627e+06	9.67886e+06	7.43643e+06	8.17979e+06	3.8655e+06	8.14637e+06	4.43655e+06
43	PA 36:5		72.6	C39 H67 O8 P	neg	10.76	693.45	M-H	PA	2.27247e+06	2.15502e+06	1.97033e+06	2.0045e+06	2.00054e+06	2.21615e+06	620916	751844	610756	601622	554630	485963	2.87637e+06	2.63728e+06	2.74819e+06	2.59245e+06	2.49506e+06	2.67528e+06
44	PA 36:4		79.1	C39 H69 O8 P	neg	11.371	695.465	M-H	PA	4.23533e+06	4.28619e+06	3.96442e+06	3.91757e+06	4.03684e+06	4.49393e+06	713814	857252	929954	910677	737932	903292	3.237e+06	2.97162e+06	2.88696e+06	2.99682e+06	2.96596e+06	2.90623e+06
45	PA 34:3		76.8	C37 H67 O8 P	neg	11.303	669.45	M-H	PA	3.14843e+06	3.27354e+06	2.88328e+06	3.23255e+06	3.14356e+06	3.10091e+06	718855	739873	860213	997504	829125	764468	3.49535e+06	3.21549e+06	3.06198e+06	2.96228e+06	3.72079e+06	3.22732e+06
46	PA 34:2		68.1	C37 H69 O8 P	neg	11.867	671.466	M-H	PA	6.51363e+06	6.31246e+06	5.99638e+06	6.25346e+06	6.26214e+06	6.55392e+06	1.60087e+06	1.85104e+06	1.72964e+06	2.45276e+06	1.42152e+06	1.3818e+06	7.1744e+06	6.40714e+06	5.86339e+06	6.18549e+06	5.94475e+06	6.3804e+06
47	PG 34:1		72.7	C40 H77 O10 P	neg	12.065	747.518	M-H	PG	2.29311e+07	1.06078e+07	2.06919e+07	2.35229e+07	2.44641e+07	2.49817e+07	2.29431e+06	2.48048e+06	2.54501e+06	2.47273e+06	2.27405e+06	2.42511e+06	3.64268e+07	2.99904e+07	3.34266e+07	3.11875e+07	2.96026e+07	2.96731e+07
48	PG 32:0		65.8	C38 H75 O10 P	neg	11.94	721.503	M-H	PG	6.26247e+06	6.26596e+06	6.85546e+06	5.64015e+06	6.27354e+06	6.9924e+06	934200	1.08368e+06	1.07853e+06	1.54052e+06	931424	908117	1.03486e+07	9.49634e+06	9.61443e+06	9.17762e+06	9.42765e+06	9.74417e+06
49	LPA 23:0		93.6	C26 H53 O7 P	neg	9.842	507.344	M-H	LPA	140987	136853	125725	119437	122033	130165	131642	123290	138958	58112.1	66726	60621.3	256085	217442	200732	308345	222730	195225
50	LPA 20:1		87.2	C23 H45 O7 P	neg	6.032	463.282	M-H	LPA	1.45396e+06	1.31583e+06	1.14082e+06	1.1441e+06	1.15376e+06	1.43854e+06	963693	1.16805e+06	1.13415e+06	805907	933410	762576	3.04952e+06	2.6177e+06	2.9659e+06	3.11779e+06	2.4849e+06	2.96503e+06
51	LPA 18:3		89.5	C21 H37 O7 P	neg	2.521	431.22	M-H	LPA	2.58926e+06	1.92172e+06	2.41974e+06	2.01978e+06	2.37075e+06	2.37784e+06	1.52473e+06	1.60723e+06	1.50257e+06	1.54405e+06	1.68445e+06	1.64753e+06	6.579e+06	5.47896e+06	5.50122e+06	7.20589e+06	4.22104e+06	4.23094e+06
52	LPA 18:2		92.2	C21 H39 O7 P	neg	3.323	433.236	M-H	LPA	5.32443e+06	4.48961e+06	4.65655e+06	5.01821e+06	3.86561e+06	5.09842e+06	2.71816e+06	2.79055e+06	3.08162e+06	2.80885e+06	2.44029e+06	2.8614e+06	1.01488e+07	8.93353e+06	8.81067e+06	1.0313e+07	6.59134e+06	4.82375e+06
53	LPA 18:1		94	C21 H41 O7 P	neg	4.411	435.251	M-H	LPA	1.50695e+06	1.35109e+06	1.37843e+06	1.45122e+06	1.5285e+06	1.66473e+06	933479	1.04105e+06	1.11044e+06	899767	1.1e+06	971408	1.97568e+06	1.60065e+06	1.71082e+06	1.5588e+06	1.54985e+06	1.65832e+06
54	LPA 16:0		88.7	C19 H39 O7 P	neg	4.055	409.236	M-H	LPA	3.45371e+06	2.9088e+06	2.92231e+06	3.39357e+06	3.11425e+06	3.48477e+06	1.90041e+06	2.13568e+06	1.84411e+06	1.48356e+06	1.96786e+06	1.75747e+06	6.05033e+06	5.6291e+06	5.86776e+06	6.23276e+06	4.56797e+06	4.31578e+06
55	LPC 18:0		80.4	C26 H54 N O7 P	neg	5.984	568.362	M+COOH	LPC	2.31217e+06	1.85662e+06	2.58881e+06	2.04833e+06	2.54648e+06	2.90372e+06	3.11197e+06	2.92387e+06	2.85211e+06	2.19236e+06	2.47135e+06	2.38401e+06	7.19972e+06	7.27142e+06	6.96151e+06	7.81083e+06	8.14188e+06	8.15703e+06
56	LPE 18:3		66.5	C23 H42 N O7 P	neg	2.75	474.263	M-H	LPE	1.64143e+06	1.3054e+06	1.35105e+06	1.5071e+06	1.32841e+06	1.49863e+06	955932	962317	897752	854621	906963	934220	7.69767e+06	7.20396e+06	7.15433e+06	7.91802e+06	4.82446e+06	5.35856e+06
57	LPE 18:1		68.1	C23 H46 N O7 P	neg	4.76	478.295	M-H	LPE	984270	759489	786855	828333	783272	908935	569789	569380	509935	533626	526337	470812	2.7564e+06	2.48019e+06	2.81321e+06	2.87419e+06	2.51568e+06	2.59278e+06
58	LPE 16:0		69.1	C21 H44 N O7 P	neg	4.395	452.277	M-H	LPE	2.88645e+06	2.3673e+06	2.66951e+06	2.63781e+06	2.62077e+06	2.85083e+06	1.77708e+06	1.91749e+06	2.13717e+06	1.54897e+06	1.72157e+06	1.65703e+06	9.31476e+06	7.86094e+06	8.0632e+06	7.85385e+06	8.37176e+06	7.59234e+06
59	LPG 18:2		65.3	C24 H45 O9 P	neg	3.085	507.272	M-H	LPG	3.18525e+06	2.91018e+06	2.6725e+06	3.08195e+06	2.80867e+06	3.54489e+06	1.05259e+06	1.4935e+06	1.1059e+06	1.10617e+06	1.20401e+06	1.20982e+06	7.98335e+06	7.07502e+06	8.27873e+06	6.54799e+06	5.90055e+06	6.64452e+06
60	LPG 18:1		69.6	C24 H47 O9 P	neg	3.831	509.288	M-H	LPG	747634	935859	636937	889149	657663	682930	301618	384942	276596	367869	399003	310837	1.91572e+06	1.9184e+06	1.87107e+06	1.85821e+06	1.41946e+06	1.27467e+06
61	LPG 16:0		78.3	C22 H45 O9 P	neg	3.439	483.272	M-H	LPG	3.51265e+06	2.96732e+06	2.84183e+06	2.97412e+06	2.59608e+06	3.16269e+06	686669	837381	706733	755113	764954	760317	7.55816e+06	5.55231e+06	7.02977e+06	6.83907e+06	3.87401e+06	5.02702e+06
62	LPI 18:3		61.6	C27 H47 O12 P	neg	2.002	593.273	M-H	LPI	1.26525e+06	1.17264e+06	1.11671e+06	1.07607e+06	286227	120987	724193	1.04718e+06	515361	880511	1.1881e+06	1.03737e+06	2.72455e+06	2.26194e+06	2.51277e+06	2.60202e+06	1.53111e+06	1.98275e+06
63	LPI 18:2		62.3	C27 H49 O12 P	neg	2.707	595.289	M-H	LPI	2.55025e+06	2.19837e+06	2.17039e+06	2.42685e+06	2.56887e+06	2.60441e+06	1.67298e+06	1.69963e+06	1.53784e+06	1.6375e+06	1.58801e+06	1.56556e+06	5.71123e+06	5.33814e+06	5.51058e+06	6.14231e+06	3.98586e+06	4.50053e+06
64	LPI 16:0		67	C25 H49 O12 P	neg	3.339	571.289	M-H	LPI	5.38052e+06	4.80854e+06	4.98134e+06	5.44676e+06	3.96951e+06	5.03455e+06	2.51554e+06	2.9552e+06	2.50483e+06	2.50956e+06	2.32824e+06	2.70539e+06	1.15693e+07	9.53377e+06	1.1125e+07	1.20791e+07	7.23702e+06	8.96481e+06
65	Cer-NP t43:0		69.2	C43 H87 N O4	neg	15.656	724.646	M+COOH	Cer	1.35988e+06	1.36331e+06	1.28597e+06	1.02918e+06	1.01671e+06	1.10788e+06	1.50391e+06	1.27761e+06	1.6479e+06	1.5557e+06	1.48145e+06	1.55955e+06	1.77519e+06	1.43624e+06	1.80218e+06	1.81736e+06	1.30174e+06	1.38311e+06
66	Cer-NP t42:1		66.1	C42 H83 N O4	neg	15.06	710.632	M+COOH	Cer	8.43237e+06	8.42524e+06	7.81884e+06	8.05376e+06	8.17571e+06	7.57936e+06	1.23072e+07	1.25632e+07	1.35785e+07	9.65582e+06	1.13195e+07	1.079e+07	1.41104e+07	1.3014e+07	1.33732e+07	1.23706e+07	1.38906e+07	1.57653e+07
67	Cer-NP t42:0		65.6	C42 H85 N O4	neg	15.325	710.632	M+COOH	Cer	6.15514e+06	6.86464e+06	7.41382e+06	6.47587e+06	6.29071e+06	4.98026e+06	8.12723e+06	8.3145e+06	9.83438e+06	6.17829e+06	6.34724e+06	6.58392e+06	1.10695e+07	9.89433e+06	1.06449e+07	9.87826e+06	8.55564e+06	9.71586e+06
68	Cer-NP t41:0		65.9	C41 H83 N O4	neg	14.983	712.647	M+COOH	Cer	1.95131e+06	1.75871e+06	1.78467e+06	1.65576e+06	2.00378e+06	1.92227e+06	2.09476e+06	2.43022e+06	2.24419e+06	1.55151e+06	1.72719e+06	1.65783e+06	3.63892e+06	3.1445e+06	3.87374e+06	4.00074e+06	3.36824e+06	4.32085e+06
69	Cer-AP t43:1		63	C43 H85 N O5	neg	15.074	740.645	M+COOH	Cer	1.3084e+06	1.37245e+06	1.30508e+06	1.24855e+06	1.34114e+06	1.37763e+06	7.6974e+06	7.69341e+06	6.62426e+06	6.27085e+06	7.12028e+06	6.84203e+06	1.05269e+06	979072	988637	1.09519e+06	1.005e+06	1.13615e+06
70	Cer-AP t42:0		67.1	C42 H85 N O5	neg	15.018	728.648	M+COOH	Cer	1.778e+07	1.71827e+07	1.77163e+07	1.6734e+07	1.79465e+07	1.67546e+07	3.66871e+07	3.61517e+07	3.93989e+07	2.75696e+07	3.33875e+07	3.01227e+07	1.81688e+07	1.64994e+07	1.74113e+07	1.66265e+07	1.74329e+07	2.03108e+07
71	Cer-AP t41:1		64.5	C41 H81 N O5	neg	14.446	712.602	M+COOH	Cer	2.62329e+06	2.93592e+06	2.74475e+06	2.535e+06	2.83106e+06	3.14677e+06	9.22719e+06	9.57787e+06	9.49076e+06	7.99157e+06	8.24156e+06	8.85307e+06	3.28425e+06	3.14369e+06	3.71493e+06	3.45389e+06	2.70847e+06	2.69928e+06
72	Cer-AP t40:2		62.8	C40 H77 N O5	neg	13.44	650.573	M-H	Cer	948278	951597	898745	885123	1.03975e+06	945772	3.1018e+06	4.58162e+06	3.94354e+06	4.52496e+06	2.61474e+06	2.99076e+06	936802	965597	984616	893874	824549	834418
73	Cer-AP t38:1		66.3	C38 H75 N O5	neg	13.386	670.556	M+COOH	Cer	1.5394e+06	1.5447e+06	1.38315e+06	1.27781e+06	1.52985e+06	1.66359e+06	4.6249e+06	7.34396e+06	7.17752e+06	6.5811e+06	4.61154e+06	4.54663e+06	1.17921e+06	1.02769e+06	976984	1.02356e+06	1.03218e+06	952643
74	MGDG 36:6		79.4	C45 H74 O10	neg	10.914	819.525	M+COOH	SL	2.88765e+06	2.55334e+06	2.21841e+06	3.66213e+06	2.25639e+06	2.17662e+06	2.65743e+06	2.98539e+06	3.25806e+06	2.38888e+06	3.08252e+06	2.47483e+06	5.11636e+06	4.68981e+06	5.52785e+06	5.2542e+06	5.05258e+06	5.06942e+06
75	MGDG 36:5		79.2	C45 H76 O10	neg	11.719	821.538	M+COOH	SL	1.15864e+07	1.13088e+07	1.13795e+07	1.15662e+07	1.24396e+07	1.22333e+07	3.43343e+06	4.00211e+06	3.77499e+06	4.30885e+06	3.41279e+06	3.61952e+06	1.51931e+07	1.3601e+07	1.21495e+07	1.31714e+07	1.26672e+07	1.25104e+07
76	MGDG 36:4		72.9	C45 H78 O10	neg	12.308	823.56	M+COOH	SL	7.14215e+06	7.42556e+06	6.85635e+06	6.85603e+06	7.7251e+06	8.14379e+06	2.93505e+06	3.89206e+06	3.67221e+06	3.28564e+06	3.14955e+06	2.76346e+06	1.03278e+07	9.24502e+06	1.01667e+07	9.03103e+06	9.01021e+06	1.04335e+07
77	MGDG 36:3		77.1	C45 H80 O10	neg	13.017	825.574	M+COOH	SL	3.56173e+06	4.01454e+06	2.78953e+06	3.42242e+06	3.49552e+06	3.40823e+06	1.73191e+06	1.63101e+06	1.75928e+06	1.92946e+06	1.54449e+06	1.67566e+06	4.60654e+06	5.22738e+06	4.43015e+06	5.33285e+06	5.28242e+06	4.37528e+06
78	MGDG 34:3		70.3	C43 H76 O10	neg	11.993	797.541	M+COOH	SL	1.2187e+06	1.17382e+06	1.06447e+06	1.19234e+06	1.26068e+06	1.39446e+06	1.71582e+06	2.05612e+06	2.16457e+06	2.09196e+06	1.8142e+06	1.70914e+06	4.44395e+06	3.70892e+06	3.30206e+06	3.09901e+06	3.34784e+06	3.2602e+06
79	MGDG 34:2		68.8	C43 H78 O10	neg	12.738	799.559	M+COOH	SL	3.74724e+06	3.55475e+06	3.07078e+06	3.52984e+06	3.61568e+06	3.86393e+06	1.98039e+06	2.18348e+06	2.25069e+06	2.88469e+06	1.75938e+06	1.88355e+06	4.19842e+06	3.7119e+06	3.39622e+06	3.22068e+06	3.12094e+06	3.45327e+06
80	DGDG 36:6		63.8	C51 H84 O15	neg	10.316	981.579	M+COOH	SL	1.92588e+07	1.89283e+07	9.05116e+06	1.92721e+07	1.92022e+07	1.99623e+07	1.14433e+07	1.26933e+07	1.10326e+07	9.00054e+06	9.05374e+06	8.36555e+06	3.27961e+07	3.02866e+07	3.15666e+07	2.87932e+07	3.22539e+07	3.44474e+07
81	DGDG 36:3		62.2	C51 H90 O15	neg	12.346	987.626	M+COOH	SL	4.59419e+06	4.80191e+06	4.46421e+06	4.52814e+06	4.92538e+06	5.15729e+06	2.41995e+06	2.60057e+06	3.08129e+06	2.49858e+06	2.53186e+06	2.42063e+06	8.09895e+06	7.55644e+06	8.27044e+06	7.14029e+06	7.11535e+06	6.80588e+06
82	DGDG 34:3		64.1	C49 H86 O15	neg	11.493	959.594	M+COOH	SL	1.61915e+07	1.71314e+07	1.73201e+07	1.6747e+07	1.72685e+07	1.77405e+07	7.56912e+06	9.4865e+06	9.2034e+06	7.76216e+06	1.01304e+07	9.10686e+06	2.23676e+07	1.9541e+07	1.92741e+07	1.90961e+07	1.86346e+07	1.8592e+07
83	DGDG 34:2		64.8	C49 H88 O15	neg	12.031	961.61	M+COOH	SL	1.91101e+06	2.03534e+06	1.70646e+06	1.90601e+06	1.95199e+06	2.05556e+06	1.00335e+06	1.14822e+06	1.20441e+06	1.17871e+06	1.07601e+06	1.11784e+06	3.25168e+06	2.86453e+06	2.91911e+06	2.60301e+06	2.76466e+06	2.45928e+06
84	α-Linolenic acid	90.6		C18 H30 O2	neg	3.356	277.217	M-H	FA	1.25514e+06	991380	941116	1.17828e+06	818529	1.14376e+06	518330	542463	475908	518146	586398	579919	2.25118e+06	1.85345e+06	2.03074e+06	2.32593e+06	1.39146e+06	1.69449e+06
85	Stearic acid	93.6		C18 H36 O2	neg	9.832	283.264	M-H	FA	705315	638822	584000	561605	607982	643592	2.20948e+06	2.23228e+06	1.83024e+06	1.05918e+06	1.1044e+06	921542	2.68496e+06	2.46639e+06	2.48242e+06	2.55821e+06	2.94105e+06	2.53296e+06
86	Oleic acid	96.3		C18 H34 O2	neg	8.451	281.248	M-H	FA	3.35649e+06	1.04512e+06	3.18491e+06	3.57803e+06	3.44691e+06	4.2632e+06	5.50452e+06	6.1085e+06	5.43101e+06	3.39951e+06	5.49083e+06	5.24207e+06	4.66503e+06	4.08906e+06	4.30316e+06	3.62513e+06	6.5098e+06	7.37093e+06
87	Methylsuccinic acid	95.7		C5 H8 O4	neg	0.913	131.033	M-H	FA	3.20868e+07	3.82503e+07	6.72218e+07	6.12663e+07	6.33911e+07	6.95212e+07	5.36053e+07	5.3993e+07	5.28667e+07	2.35995e+07	1.94168e+07	4.97193e+07	2.01395e+07	1.92784e+07	6.52445e+06	1.26058e+07	3.51713e+07	4.75852e+07
88	Linoleic acid	93.6		C18 H32 O2	neg	7.155	279.233	M-H	FA	4.48948e+06	6.05343e+06	6.51326e+06	6.33913e+06	8.01042e+06	8.63077e+06	1.5331e+07	1.56734e+07	1.48488e+07	1.10583e+07	3.37317e+06	4.05397e+06	1.96618e+07	1.76024e+07	1.90627e+07	1.83661e+07	2.27326e+07	2.51155e+07
89	Lignoceric acid	91		C24 H48 O2	neg	13.381	367.358	M-H	FA	893073	758266	812023	729067	829751	811752	2.12133e+06	1.11346e+06	1.15561e+06	1.81566e+06	1.67055e+06	1.56309e+06	3.0812e+06	2.85757e+06	2.73103e+06	2.61007e+06	2.43614e+06	2.49477e+06
90	Hexadecanedioic acid	94.7		C16 H30 O4	neg	2.593	285.207	M-H	FA	1.03853e+06	1.08334e+06	946019	1.09357e+06	914334	1.07651e+06	1.64453e+06	1.45758e+06	1.6276e+06	1.32307e+06	1.37707e+06	1.68657e+06	1.50942e+06	1.32334e+06	1.3556e+06	1.49e+06	1.00383e+06	1.10745e+06
91	Dodecanedioic acid	81.5		C12 H22 O4	neg	1.233	229.144	M-H	FA	953928	861830	1.1423e+06	969275	1.15615e+06	1.25358e+06	1.92922e+06	1.64993e+06	1.75059e+06	1.51785e+06	1.36704e+06	1.50023e+06	3.10668e+06	1.48181e+06	2.9524e+06	3.03378e+06	2.0546e+06	2.31294e+06
92	Azelaic acid	89		C9 H16 O4	neg	0.986	187.096	M-H	FA	2.9087e+06	1.99115e+06	3.33129e+06	2.78782e+06	2.87925e+06	3.65763e+06	3.11811e+06	3.24266e+06	2.62708e+06	1.64789e+06	2.34165e+06	2.71778e+06	3.47649e+06	3.34269e+06	2.68336e+06	4.97225e+06	7.3159e+06	7.38207e+06
93	9-HpODE	78.4		C18 H32 O4	neg	2.108	311.222	M-H	FA	5.53109e+06	5.90134e+06	4.70792e+06	4.35852e+06	4.89003e+06	7.65699e+06	6.36299e+06	5.57418e+06	5.69046e+06	4.84135e+06	5.24369e+06	5.47306e+06	1.41709e+07	1.62265e+07	1.26555e+07	1.5982e+07	8.51447e+06	1.08175e+07
94	16-Hydroxyhexadecanoic acid	84		C16 H32 O3	neg	5.58	271.227	M-H	FA	7.90022e+06	7.51892e+06	7.88582e+06	7.63384e+06	7.60089e+06	7.8565e+06	763219	531473	1.09121e+06	1.12284e+06	1.79604e+06	706358	1.09391e+07	1.02825e+07	9.57116e+06	1.10126e+07	692363	217852
95	13(S)-HOTrE	82.5		C18 H30 O3	neg	3.22	293.212	M-H	FA	4.9394e+06	4.63607e+06	4.67802e+06	5.19507e+06	4.40873e+06	5.07652e+06	7.68501e+06	7.79581e+06	7.07492e+06	7.10514e+06	5.8475e+06	8.60774e+06	1.05573e+07	8.69696e+06	7.93031e+06	1.28193e+07	8.79495e+06	1.15515e+07
